# Supplementary material for: Potenzial von Machine Learning bei der kurzfristigen Leistungsprognose innerhalb einer Laufkraftwerkskette
Source: Springer Nature journal article supplement (doi:10.1007/s00506-022-00849-6), 2022-02-18

# Online-Material zum Artikel „Potential von Machine Learning bei der kurzfristigen Leistungsprognose innerhalb einer Laufkraftwerkskette“

für das Laufkraftwerk Greifenstein (BGS)

Inhalt:

- 1) Zeitreihen für 5 Zeitfenster in der Validierungsphase sowie 4 Prognosestufen (4 bis 1h)
- 2) Feature Importance der ML-Modelle „Random Forest“ sowie „XGBoost“

15.12.2021

# Laufkraftwerk Greifenstein (BGS)

- Donau-Kilometer 1949,18
- Engpassleistung 293 MW
- Mittlere Rohfallhöhe 12,6 m
- Ausbaudurchfluss 3150 m<sup>3</sup>/s

*Quellen: Verbund AG, Wikipedia*

# 1) Zeitreihen

- für 5 Zeitfenster in der Validierungsphase sowie 4 Prognosestufen (4 bis 1h)
- des Benchmark-Modells „PW“ sowie der
- ML-Modelle „stepwise multiple linear regression“ (stepLM), „Random Forest“ (RF) sowie „XGBoost“
- im Vergleich zu den Messwerten
- Prediktoren-Kombination BGS3 (siehe Tab. 4 im Artikel)

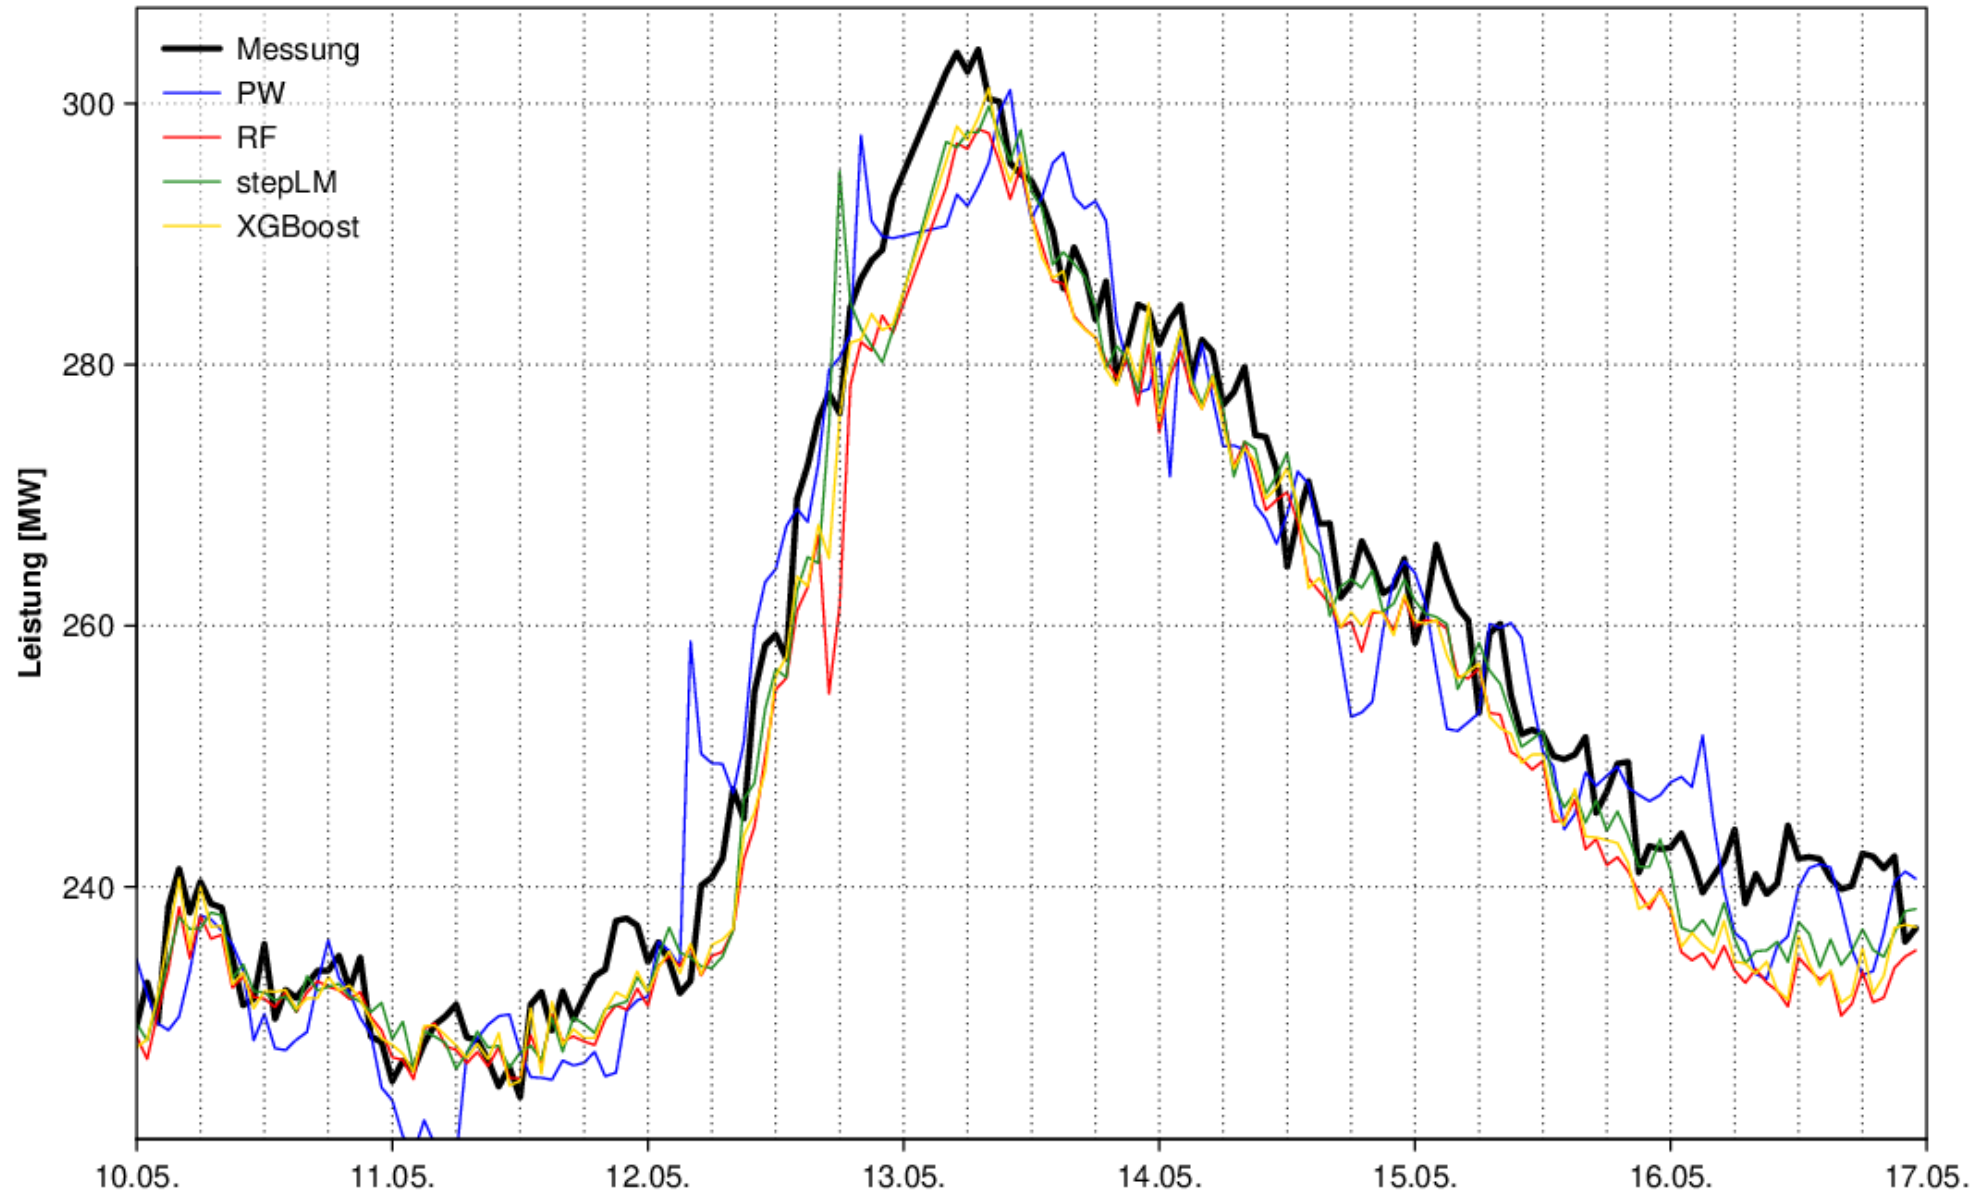

PW: RMSE = 5.98 MW | MAE = 4.68 MW  
RF: RMSE = 5.63 MW | MAE = 4.51 MW

stepLM: RMSE = 4.45 MW | MAE = 3.46 MW  
XGBoost: RMSE = 4.86 MW | MAE = 3.93 MW

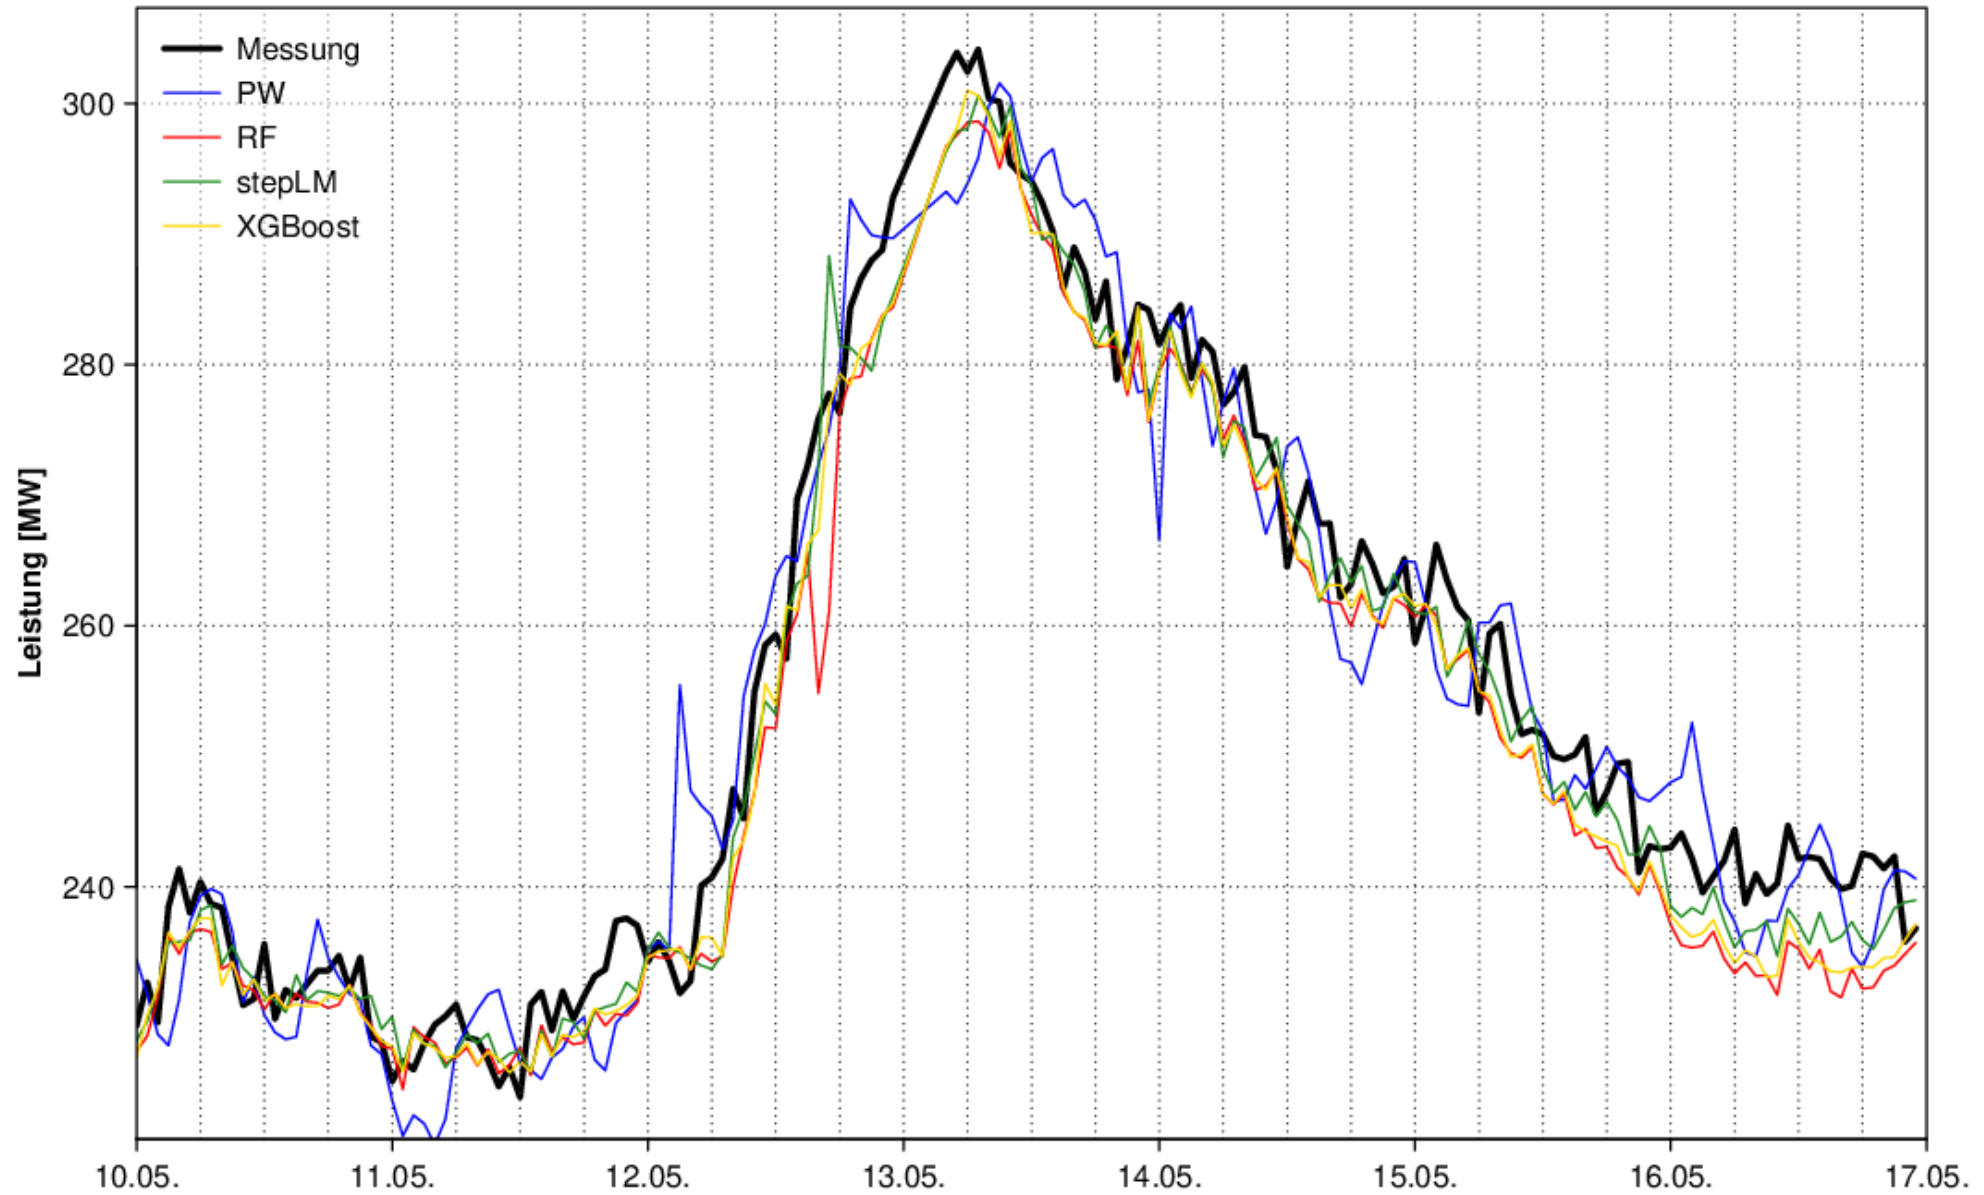

PW: RMSE = 5.49 MW | MAE = 4.26 MW  
RF: RMSE = 5.21 MW | MAE = 4.19 MW

stepLM: RMSE = 3.88 MW | MAE = 3.23 MW  
XGBoost: RMSE = 4.41 MW | MAE = 3.67 MW

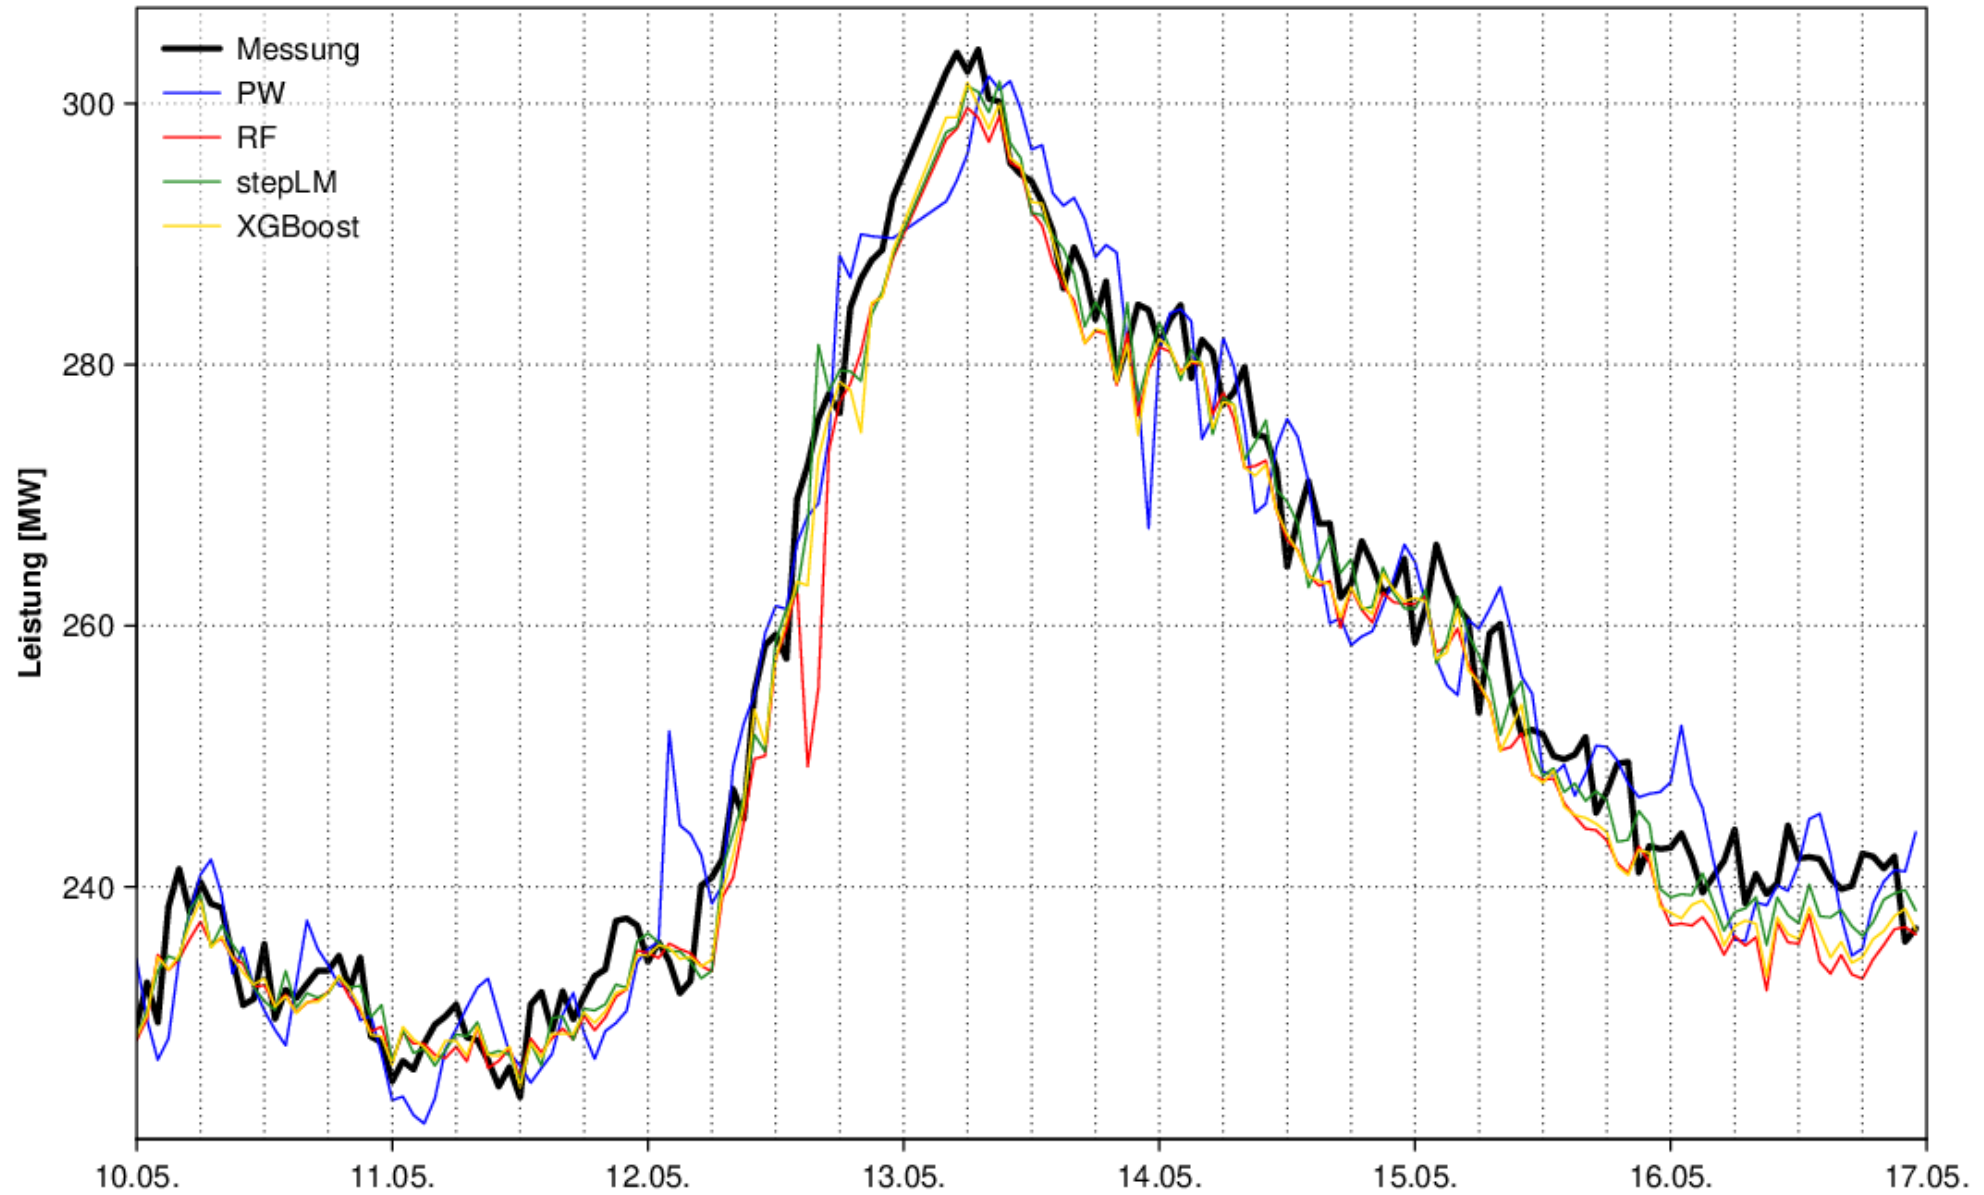

PW: RMSE = 5.03 MW | MAE = 3.95 MW  
RF: RMSE = 4.82 MW | MAE = 3.67 MW

stepLM: RMSE = 3.53 MW | MAE = 2.86 MW  
XGBoost: RMSE = 4.02 MW | MAE = 3.19 MW

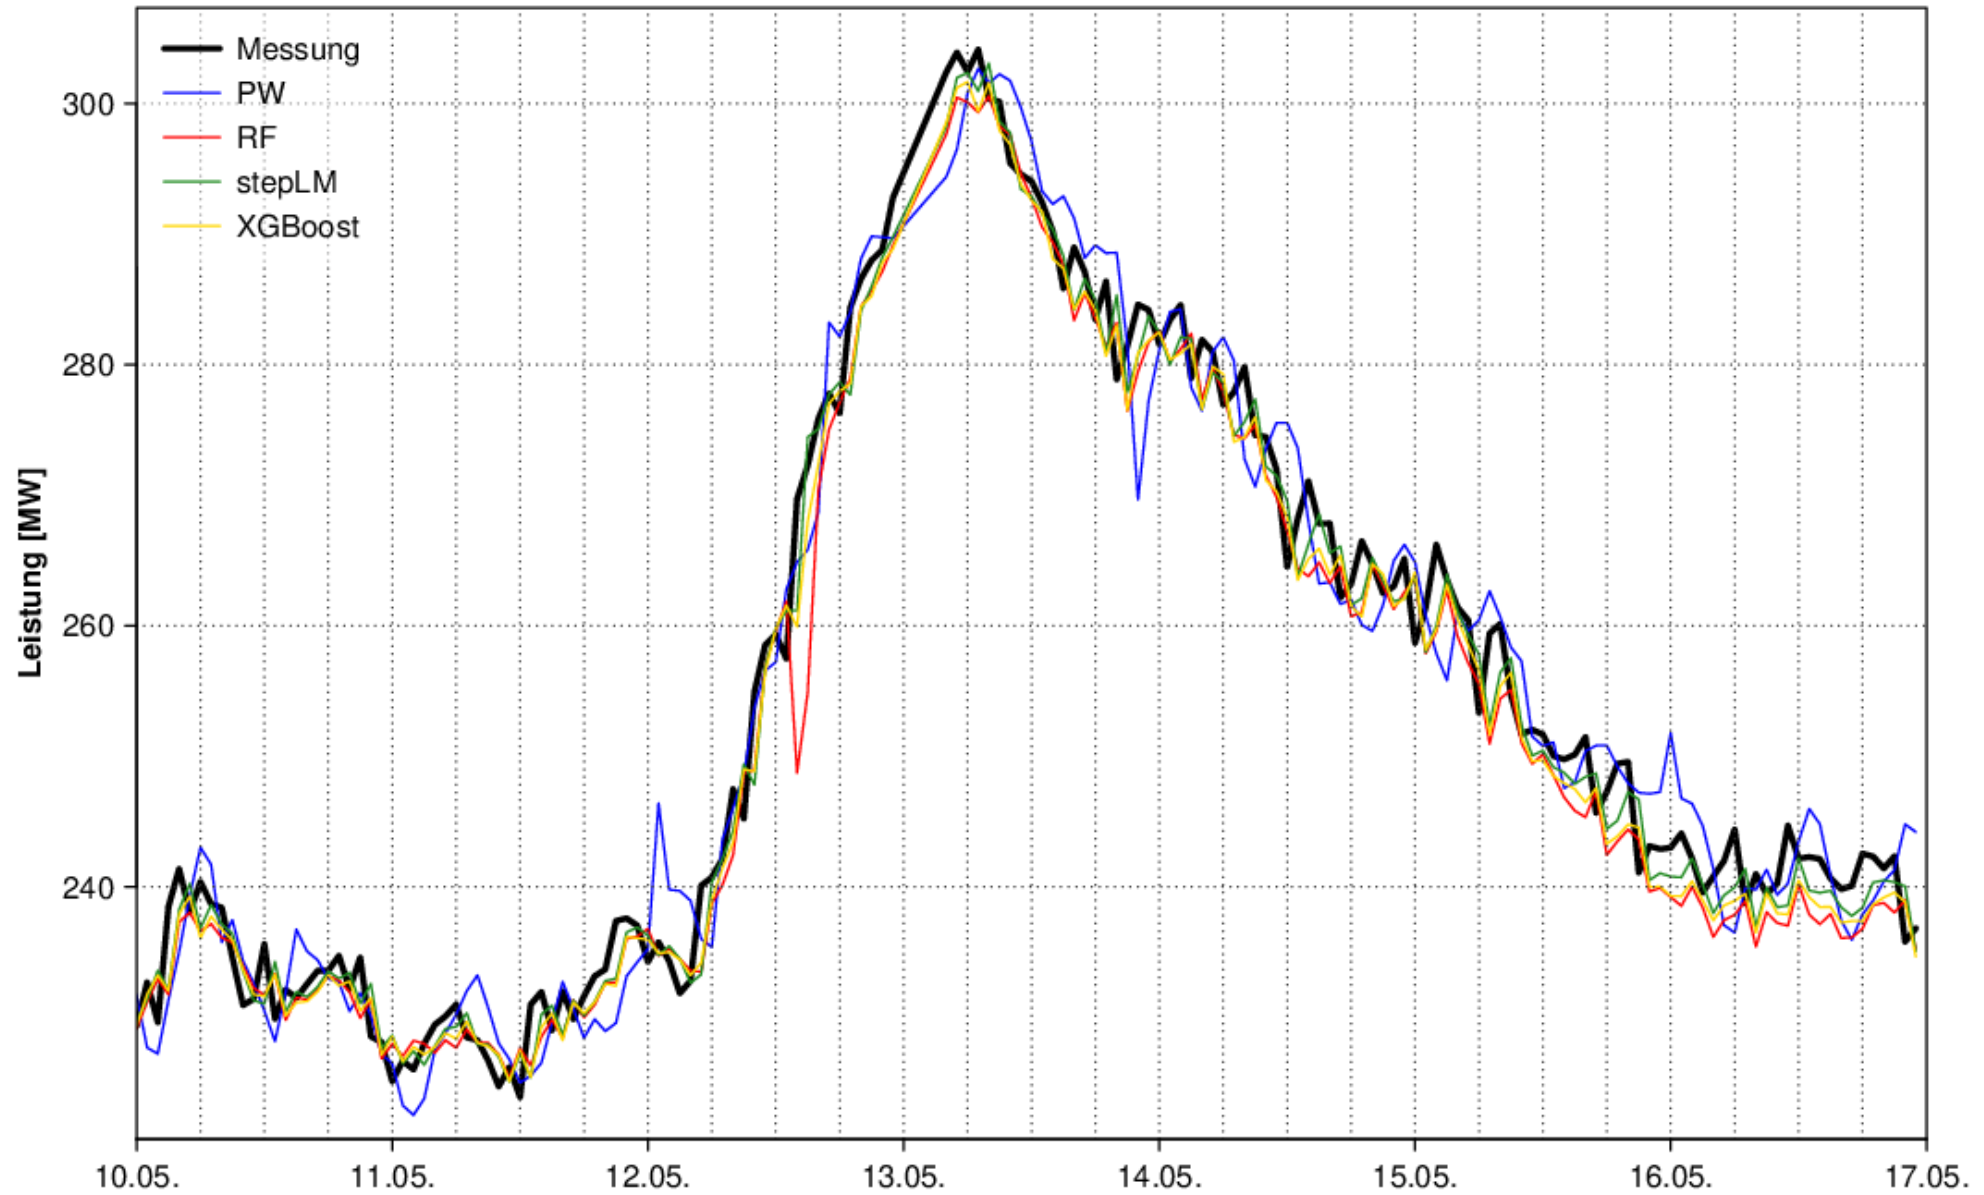

PW: RMSE = 4.31 MW | MAE = 3.42 MW  
RF: RMSE = 3.98 MW | MAE = 3.04 MW

stepLM: RMSE = 2.99 MW | MAE = 2.42 MW  
XGBoost: RMSE = 3.23 MW | MAE = 2.69 MW



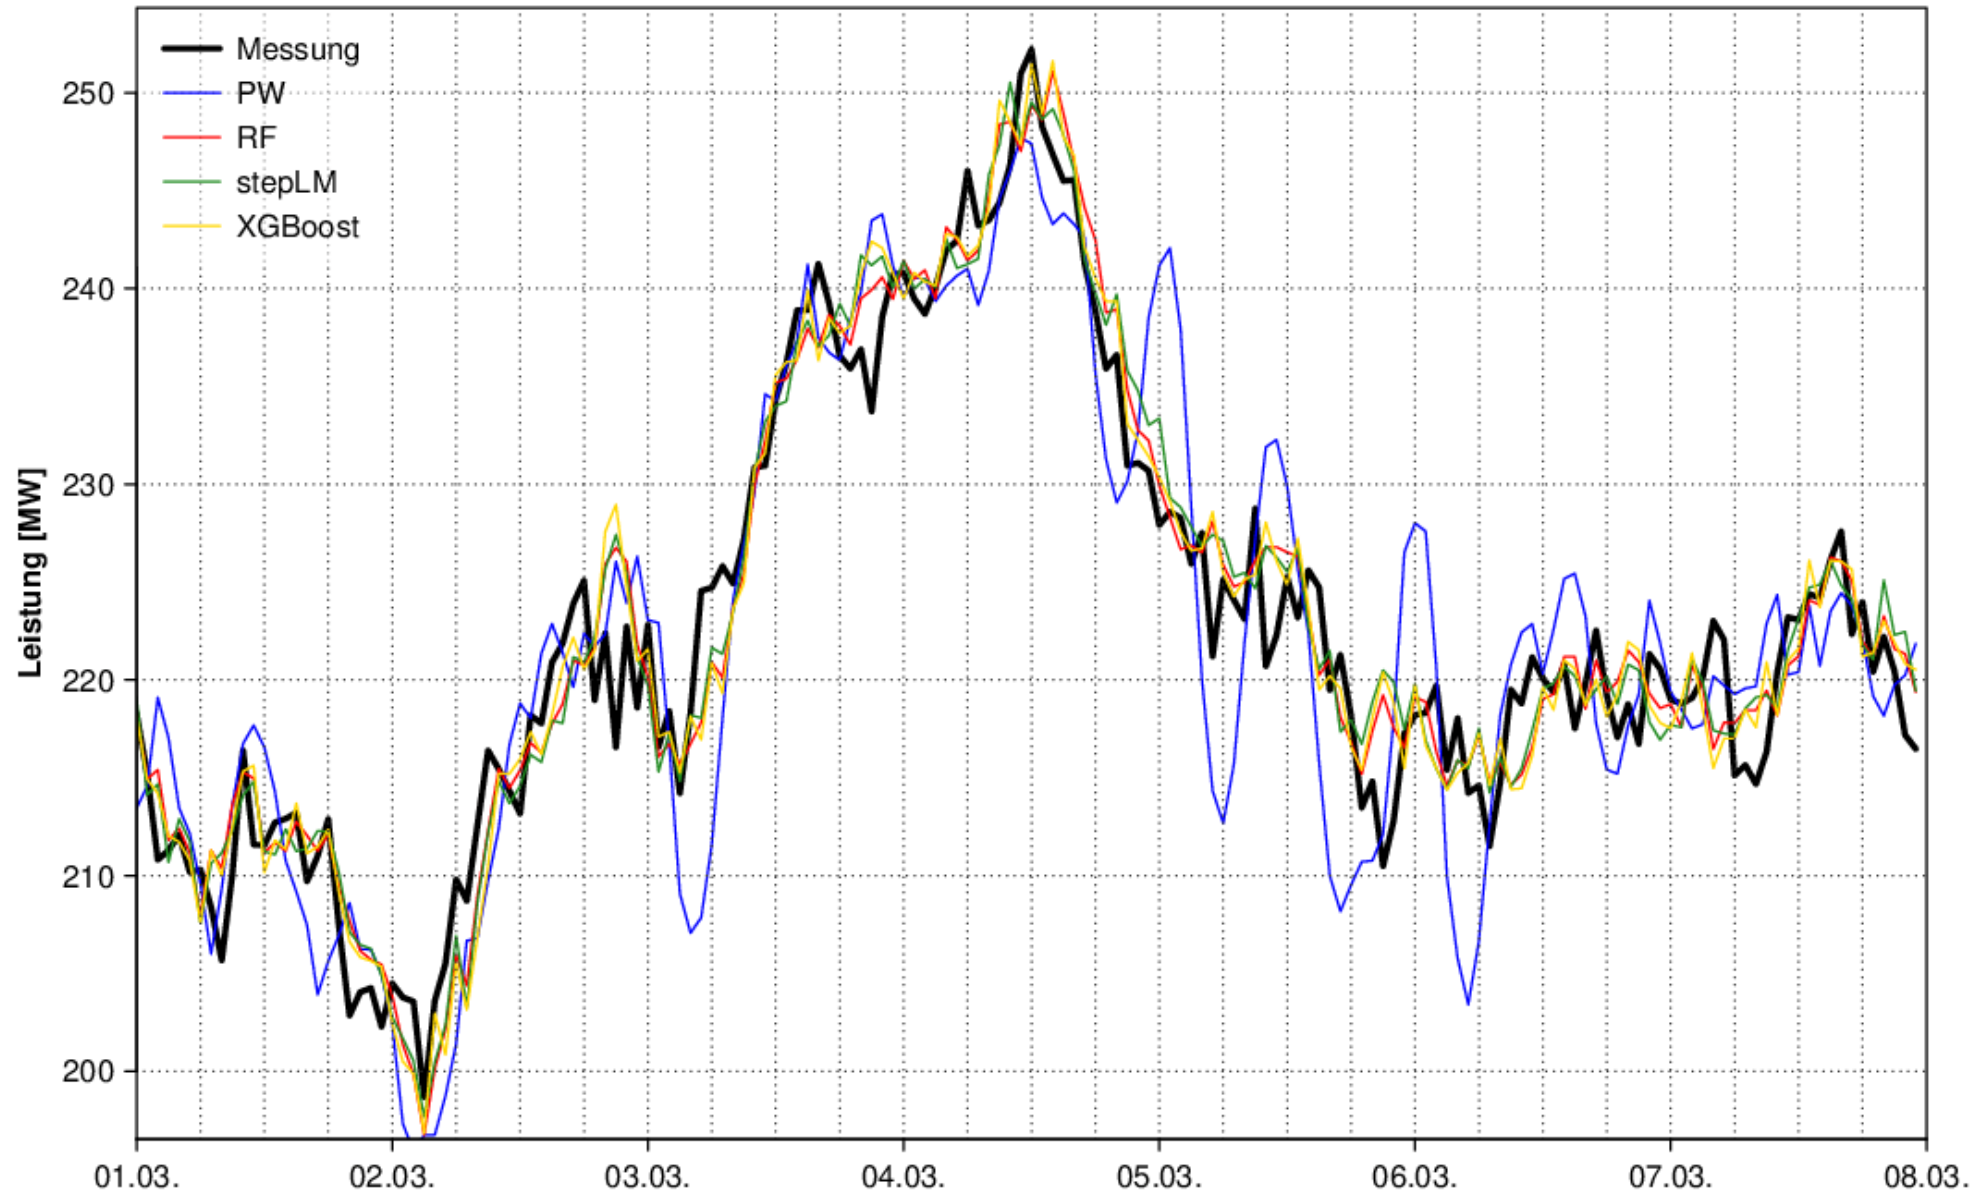

PW: RMSE = 5.33 MW | MAE = 4.12 MW  
RF: RMSE = 2.9 MW | MAE = 2.33 MW

stepLM: RMSE = 3.04 MW | MAE = 2.45 MW  
XGBoost: RMSE = 3.16 MW | MAE = 2.42 MW



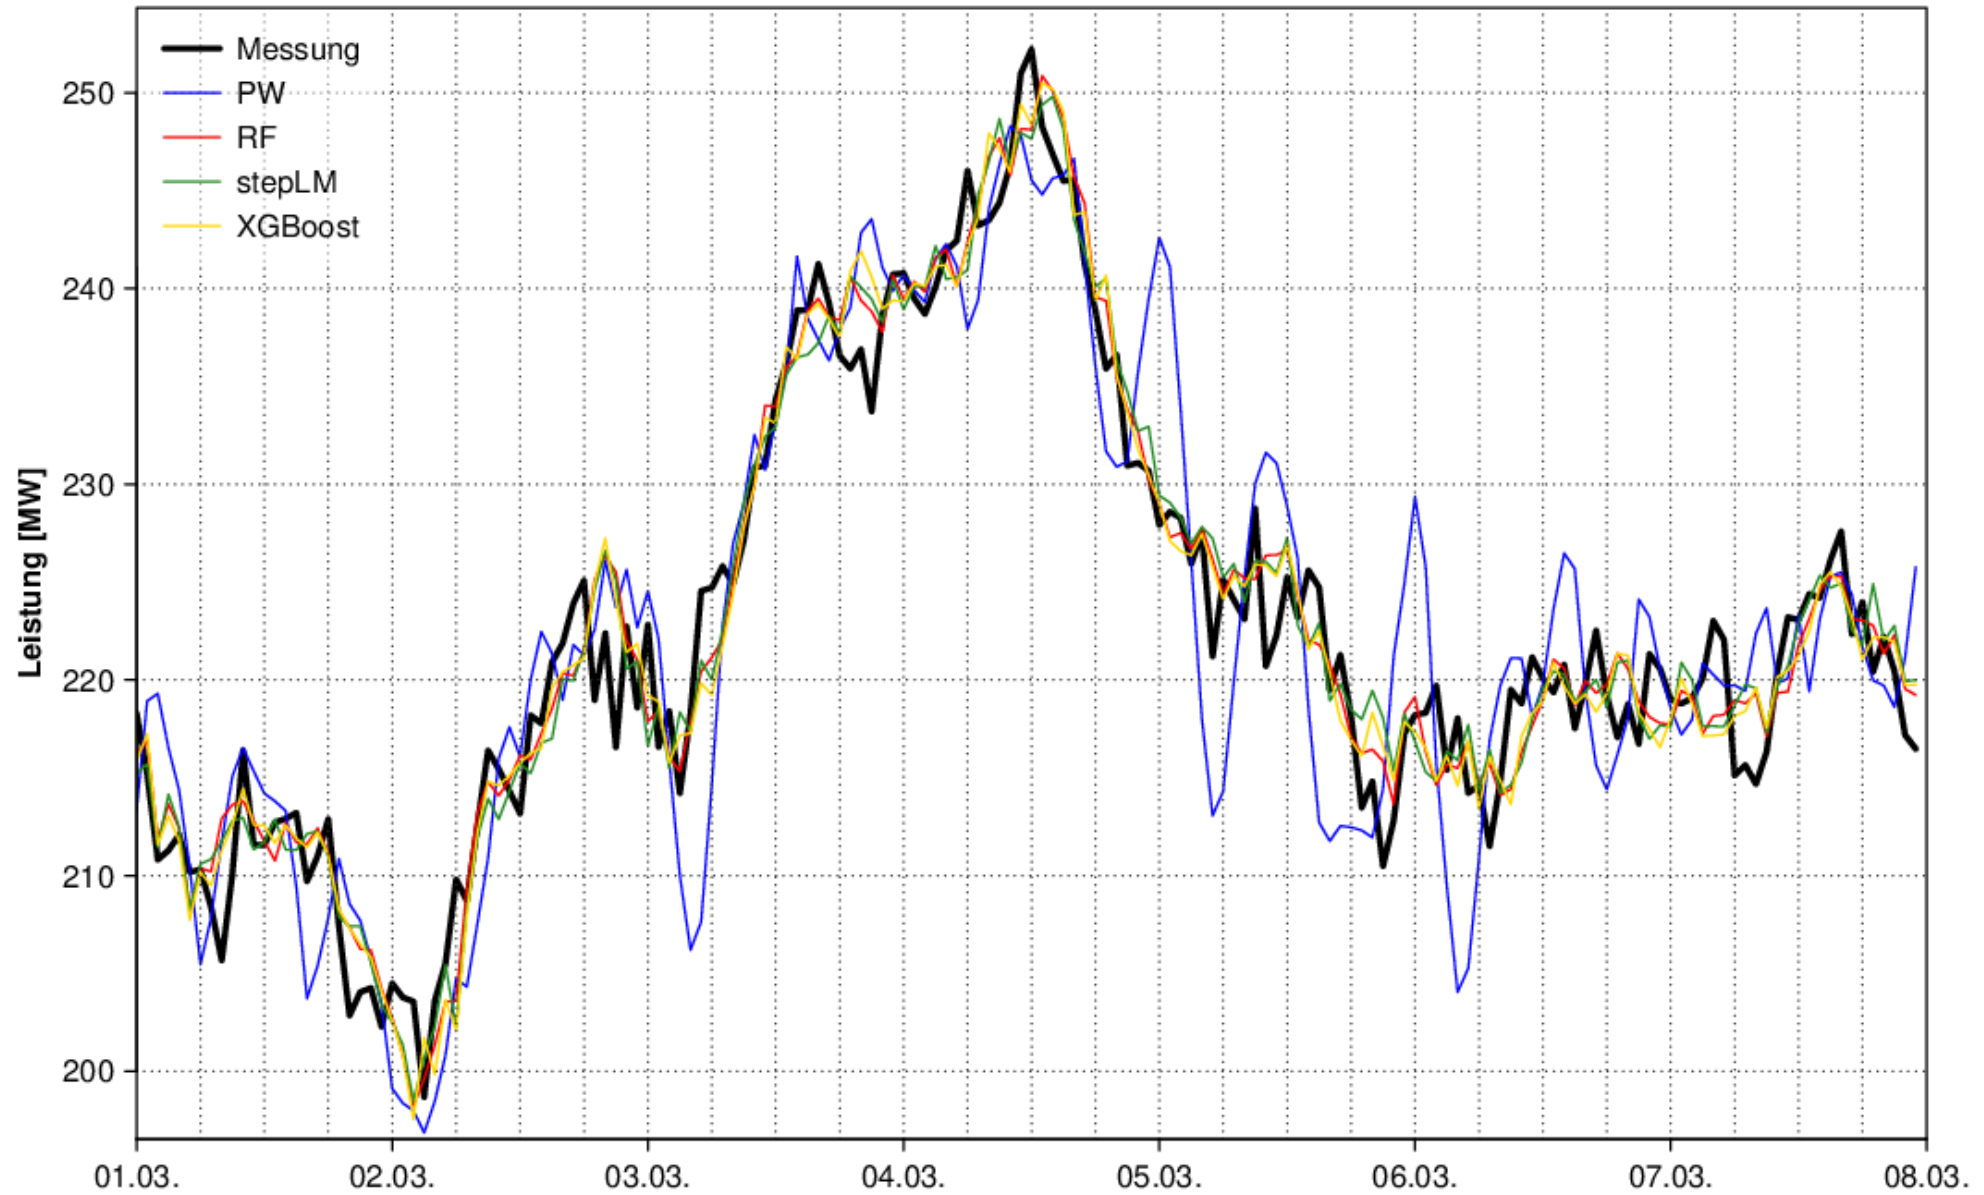

PW: RMSE = 5.2 MW | MAE = 4.04 MW  
RF: RMSE = 2.67 MW | MAE = 2.14 MW

stepLM: RMSE = 2.9 MW | MAE = 2.32 MW  
XGBoost: RMSE = 2.81 MW | MAE = 2.27 MW

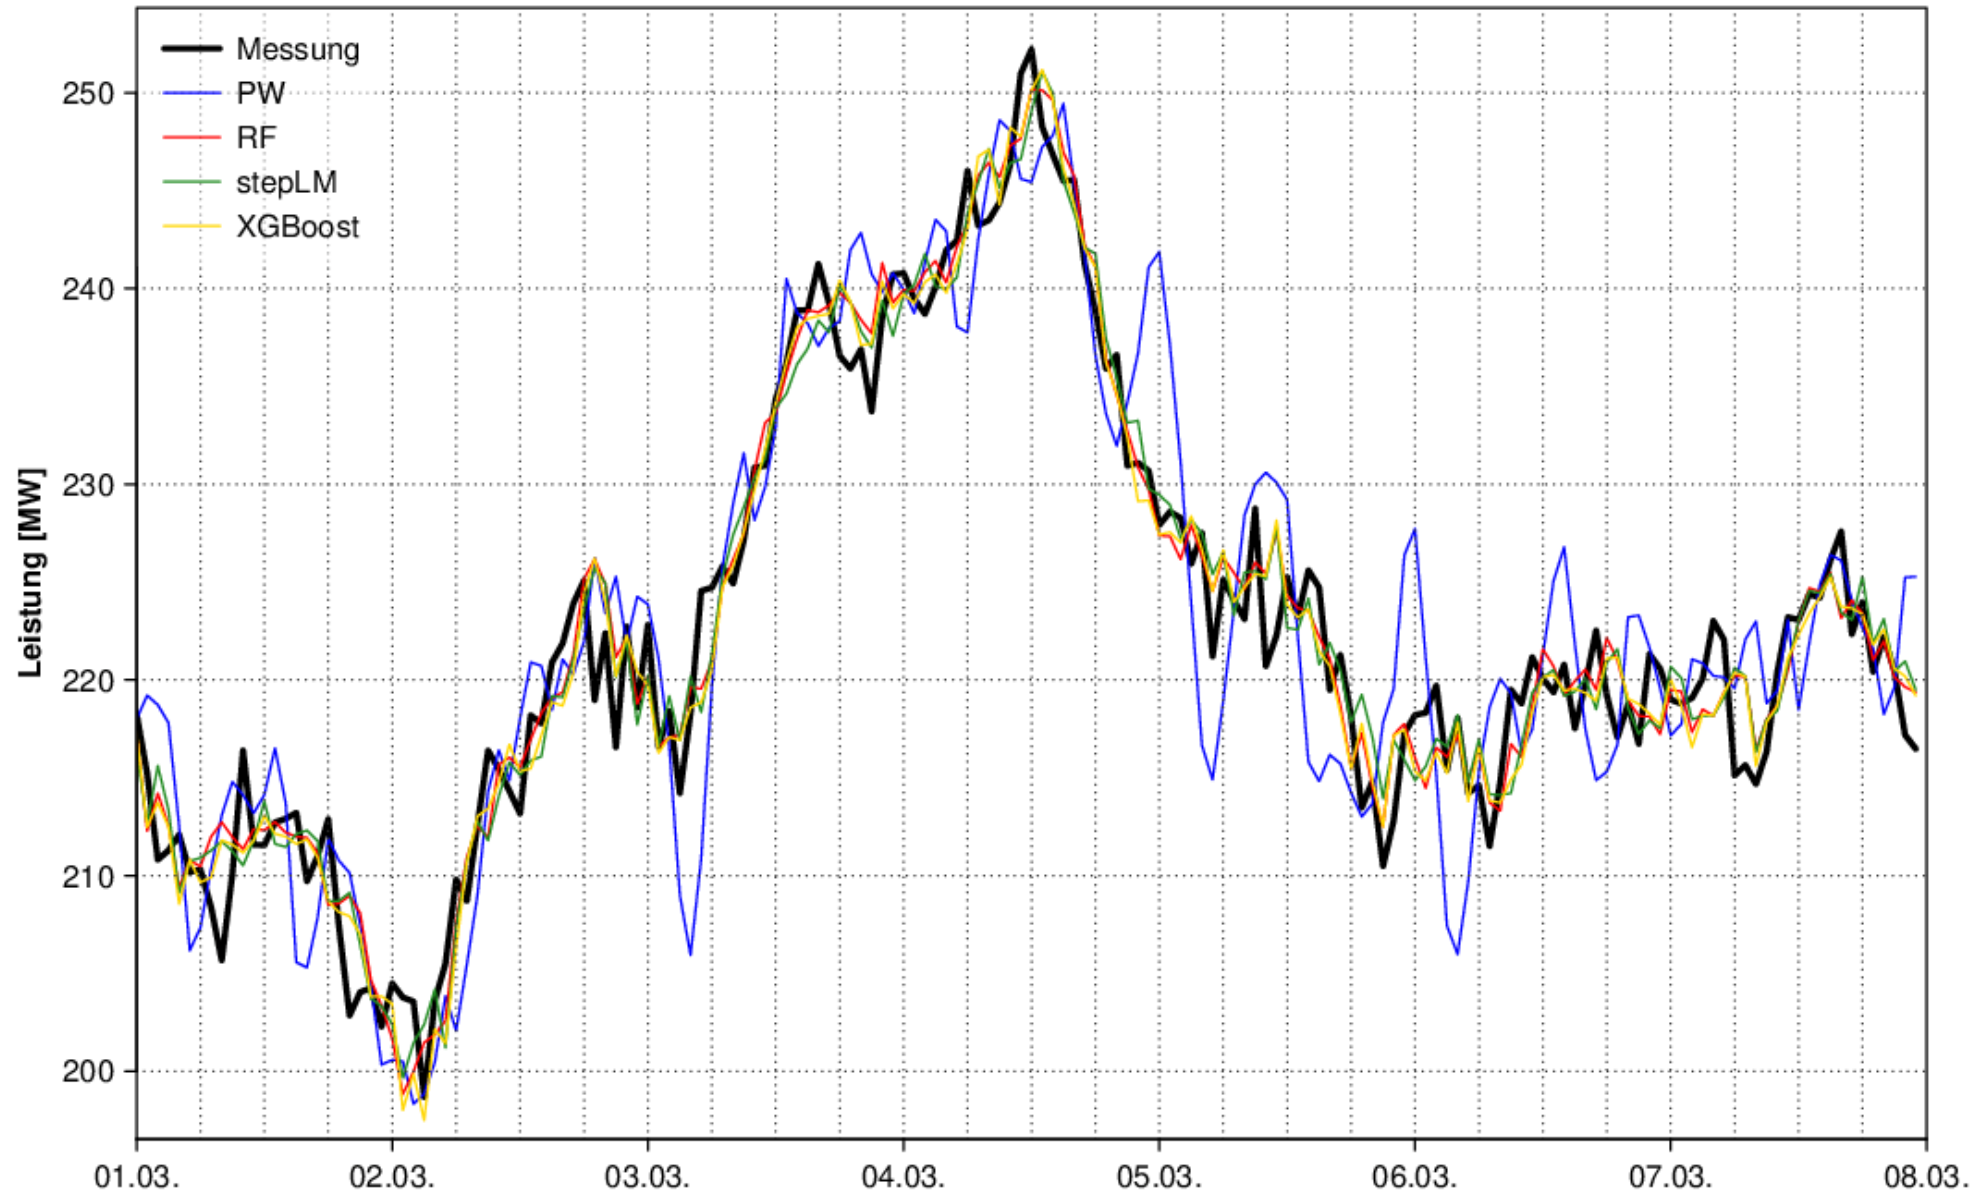

PW: RMSE = 4.88 MW | MAE = 3.82 MW  
RF: RMSE = 2.48 MW | MAE = 1.99 MW

stepLM: RMSE = 2.63 MW | MAE = 2.15 MW  
XGBoost: RMSE = 2.5 MW | MAE = 2 MW

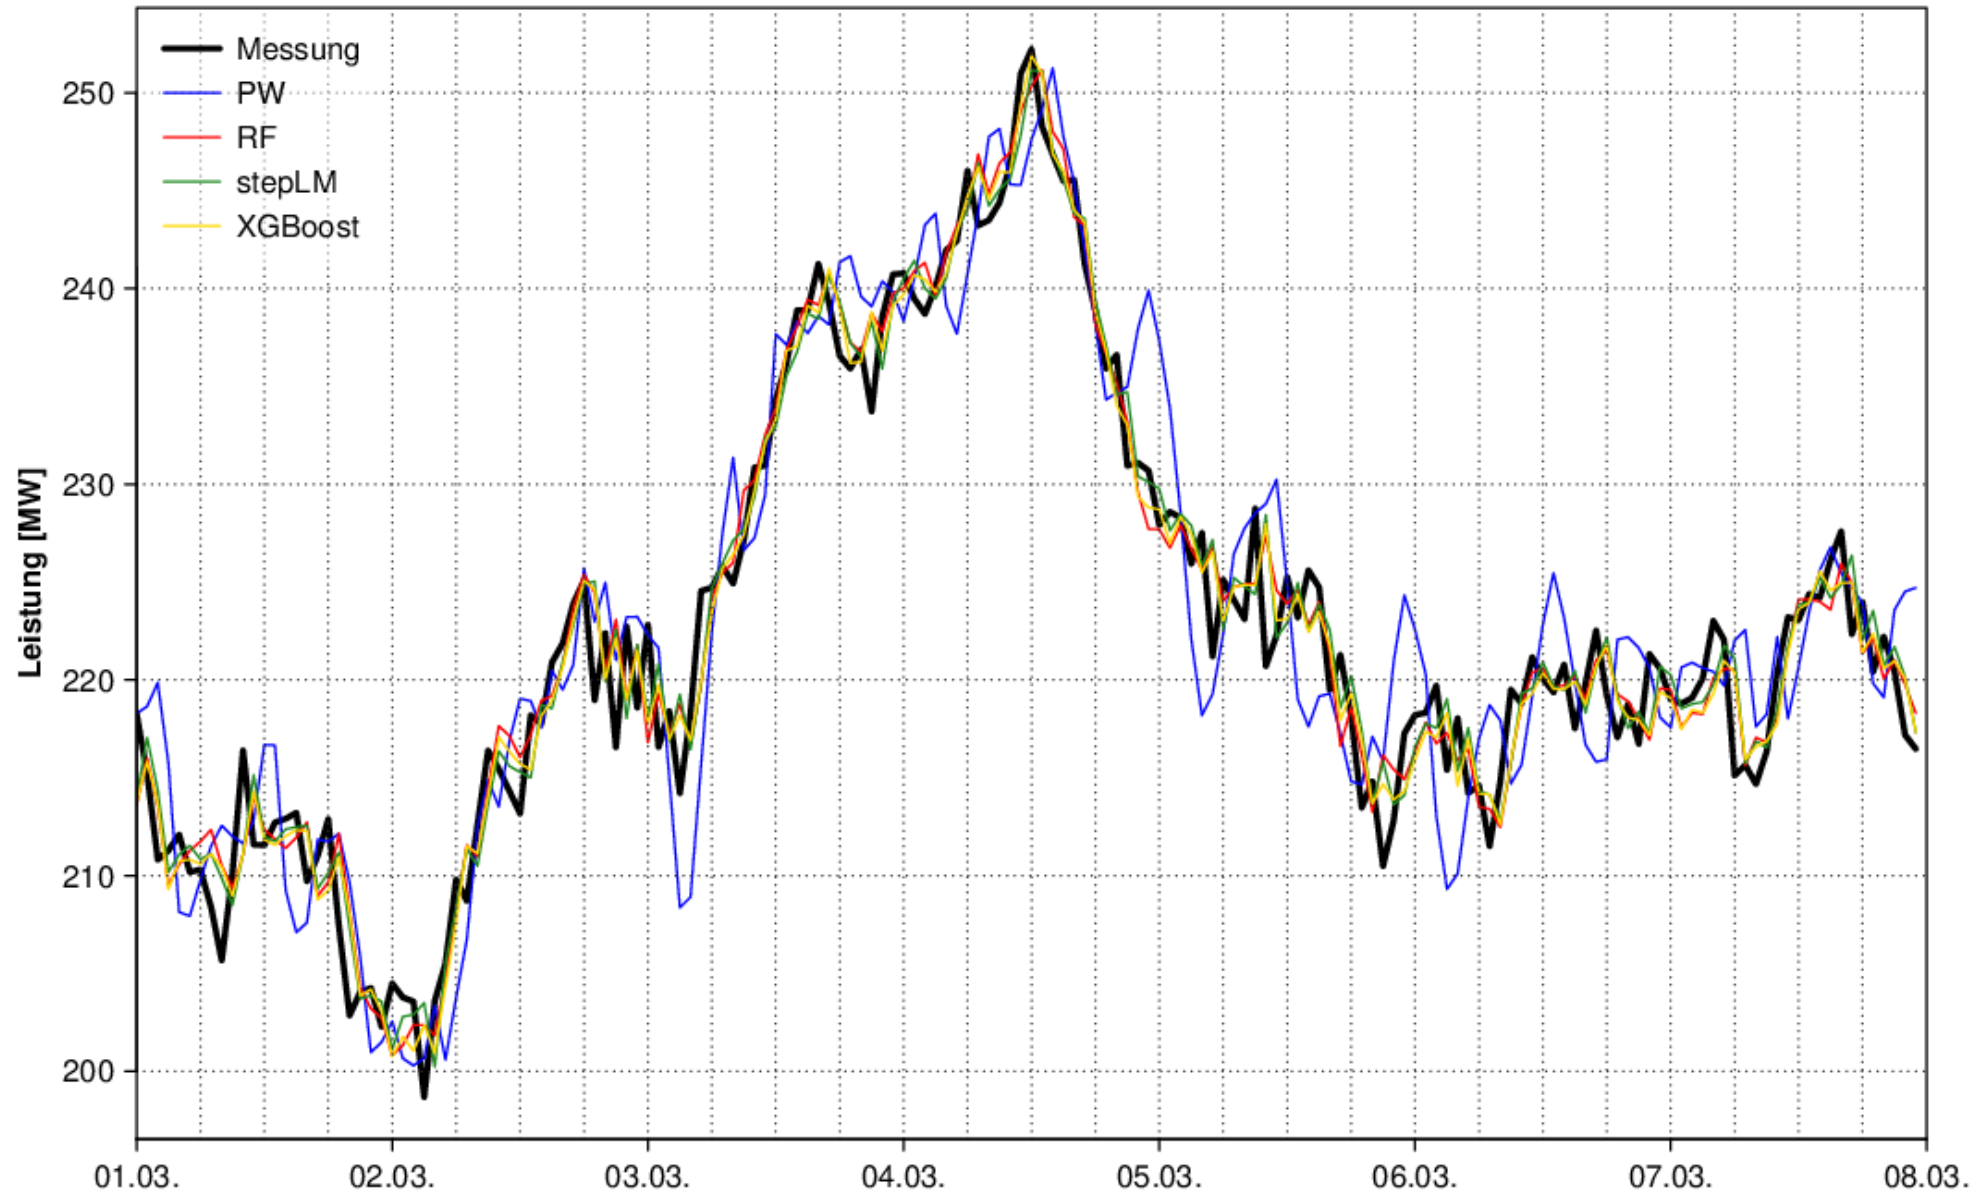

**PW: RMSE = 4.13 MW | MAE = 3.37 MW**  
**RF: RMSE = 2.44 MW | MAE = 1.97 MW**

**stepLM: RMSE = 2.52 MW | MAE = 2.02 MW**  
**XGBoost: RMSE = 2.38 MW | MAE = 1.93 MW**

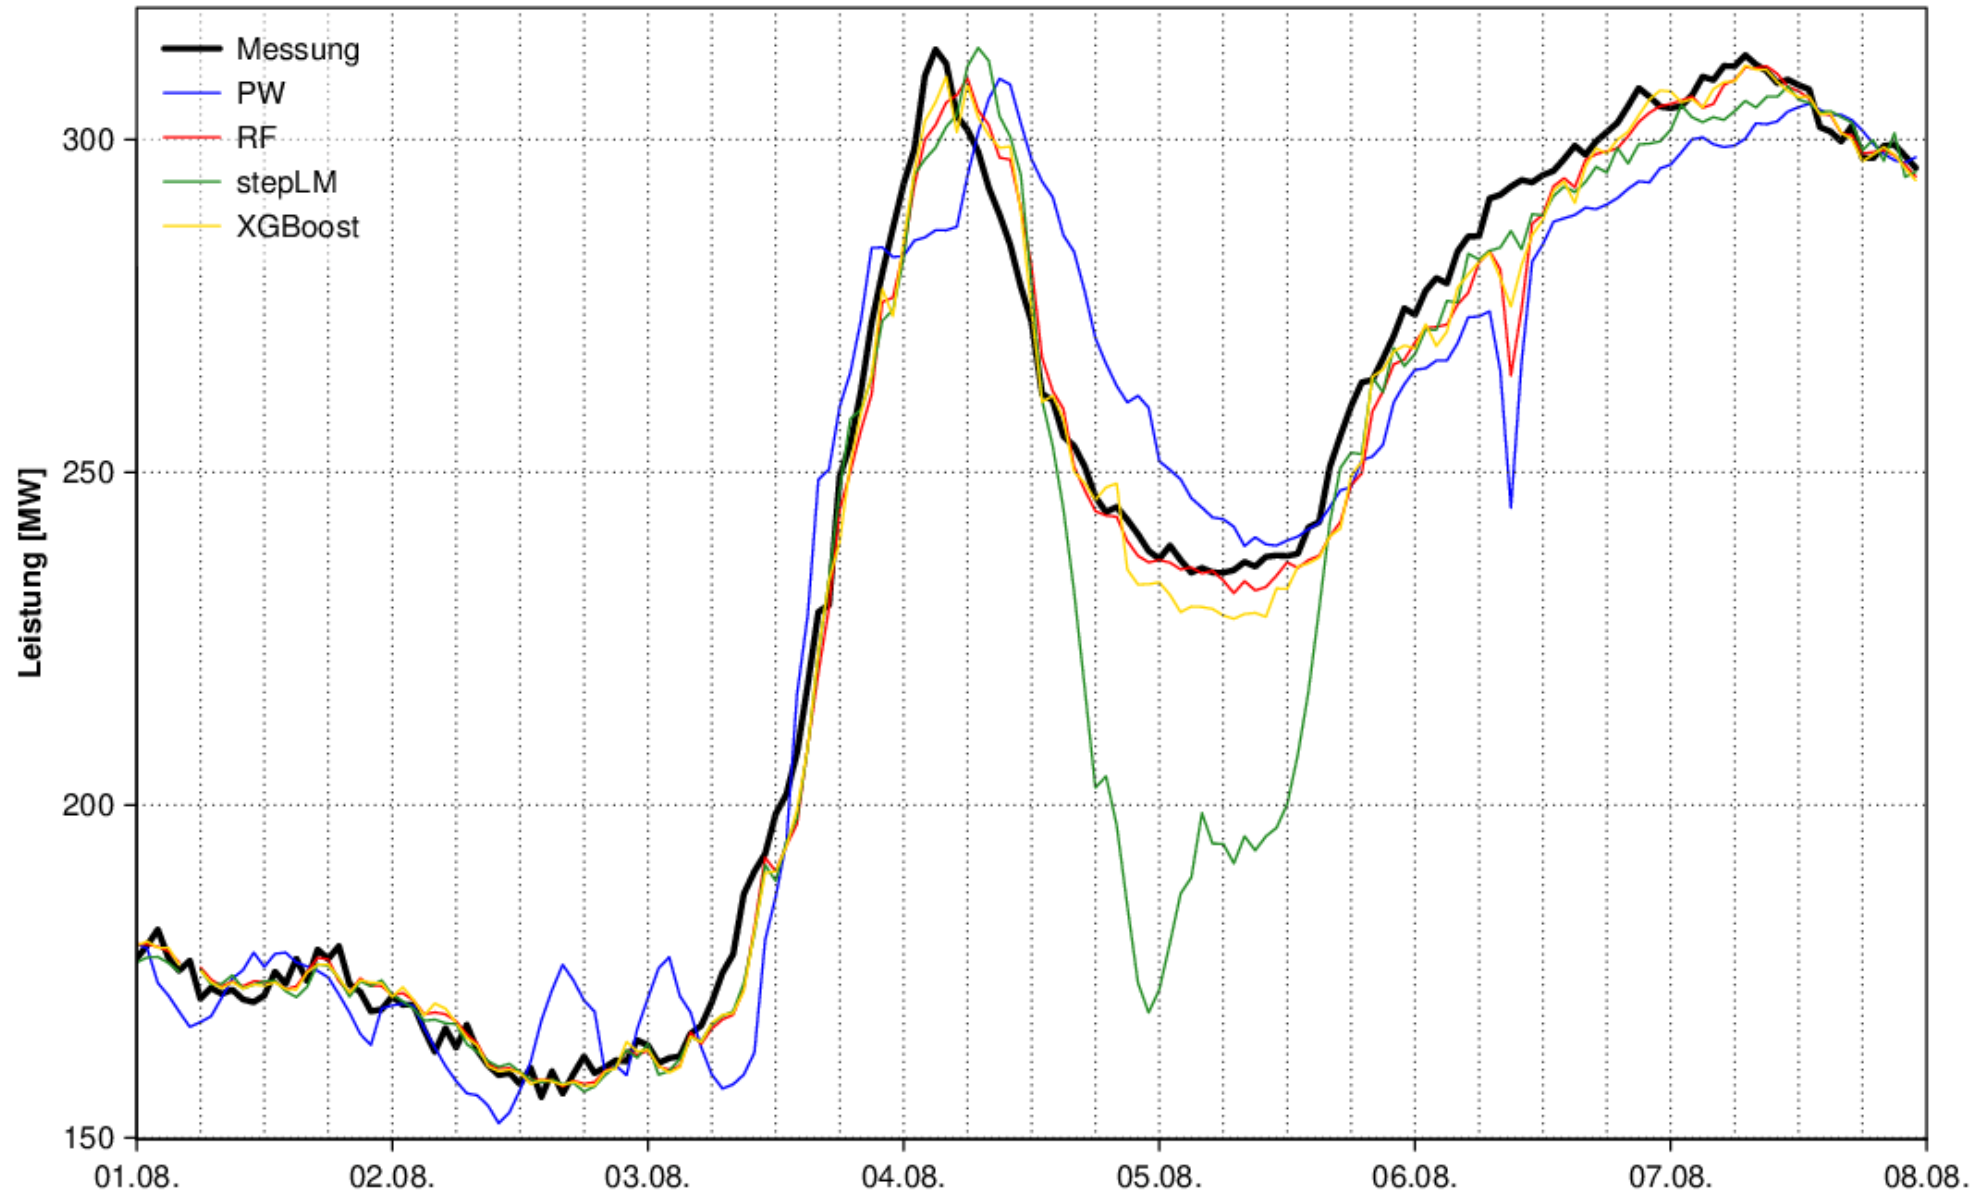

PW: RMSE = 12.93 MW | MAE = 10.04 MW  
RF: RMSE = 5.66 MW | MAE = 3.99 MW

stepLM: RMSE = 18.06 MW | MAE = 10.17 MW  
XGBoost: RMSE = 5.45 MW | MAE = 4.13 MW



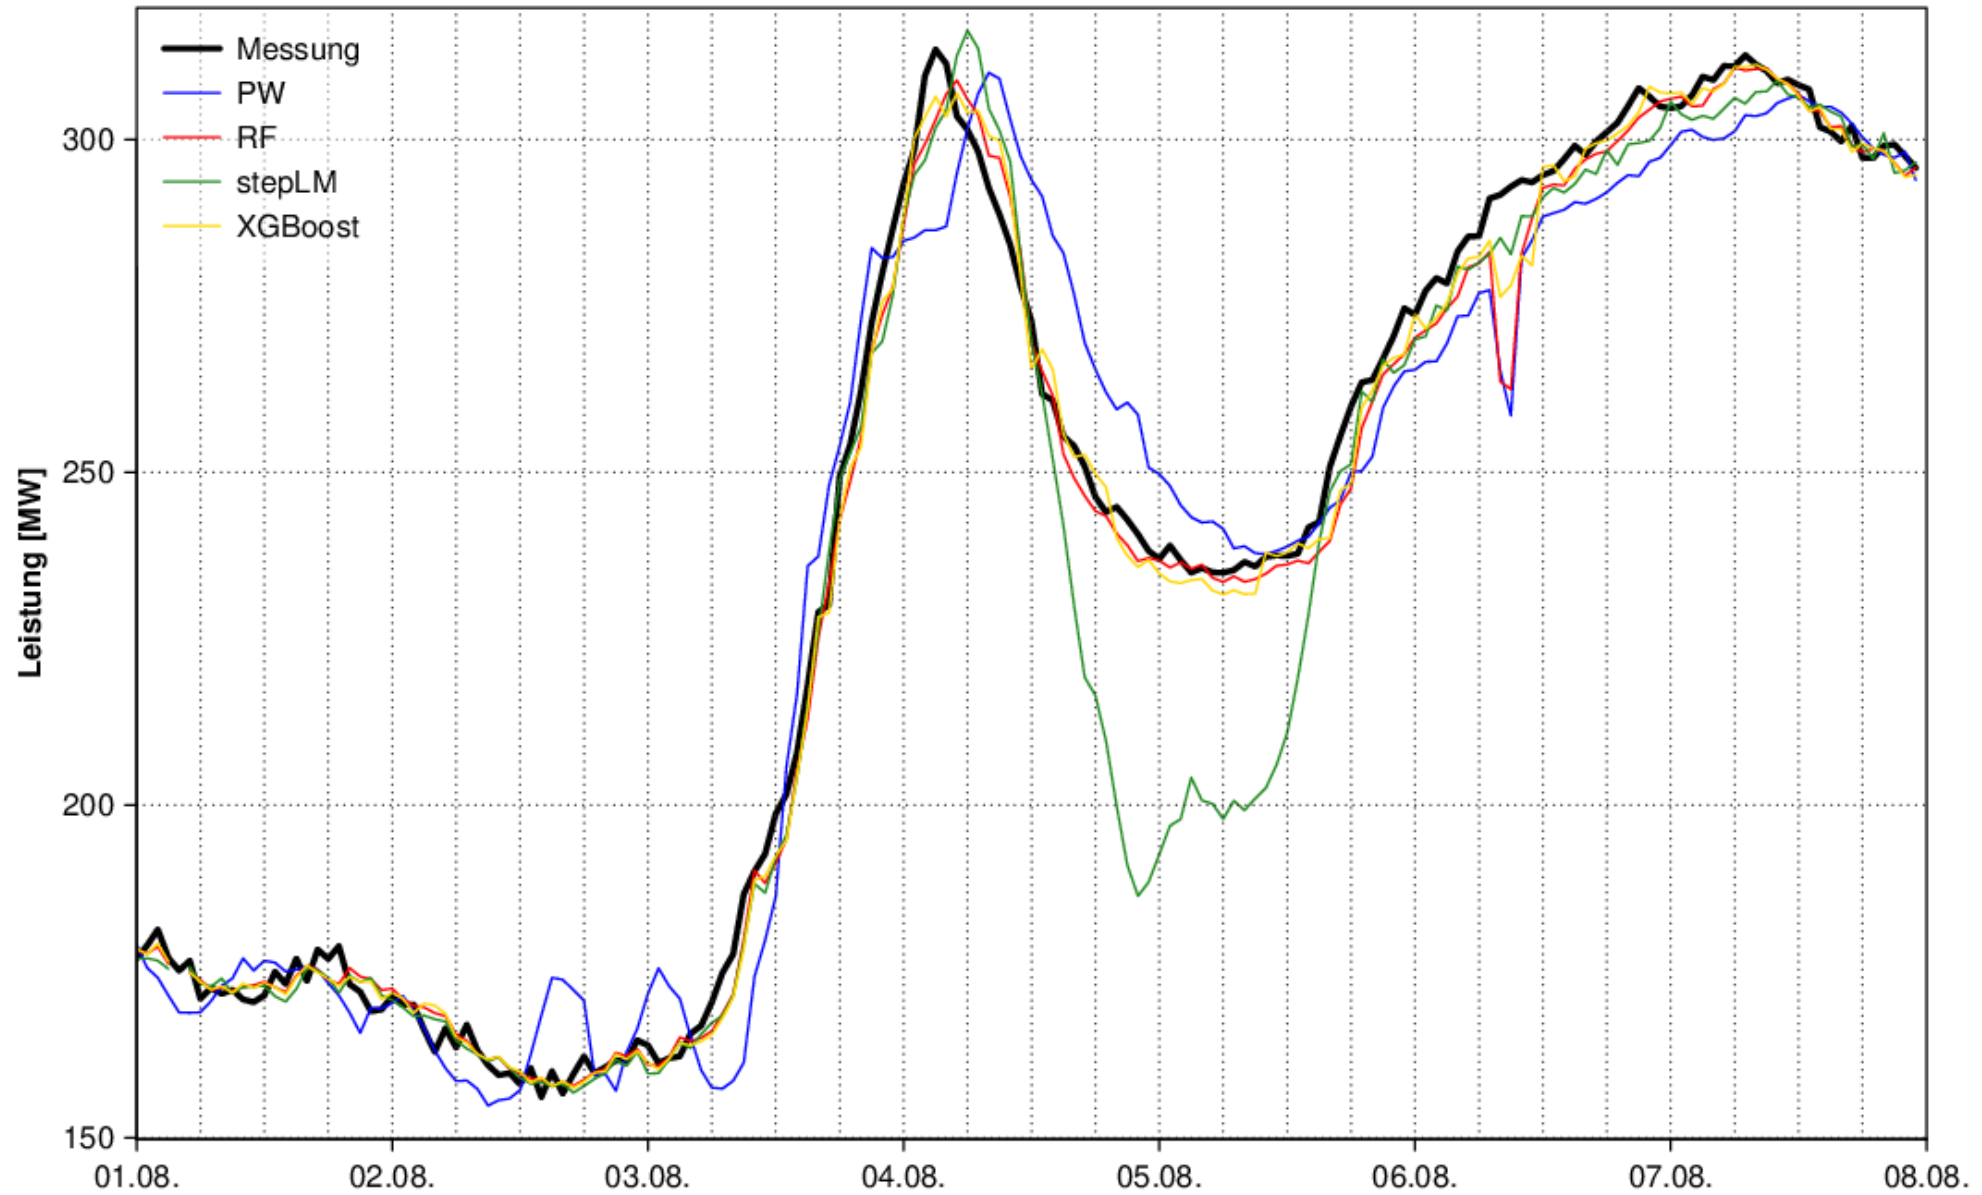

PW: RMSE = 10.97 MW | MAE = 8.5 MW  
RF: RMSE = 5.14 MW | MAE = 3.48 MW

stepLM: RMSE = 14.47 MW | MAE = 8.38 MW  
XGBoost: RMSE = 4.35 MW | MAE = 3.26 MW

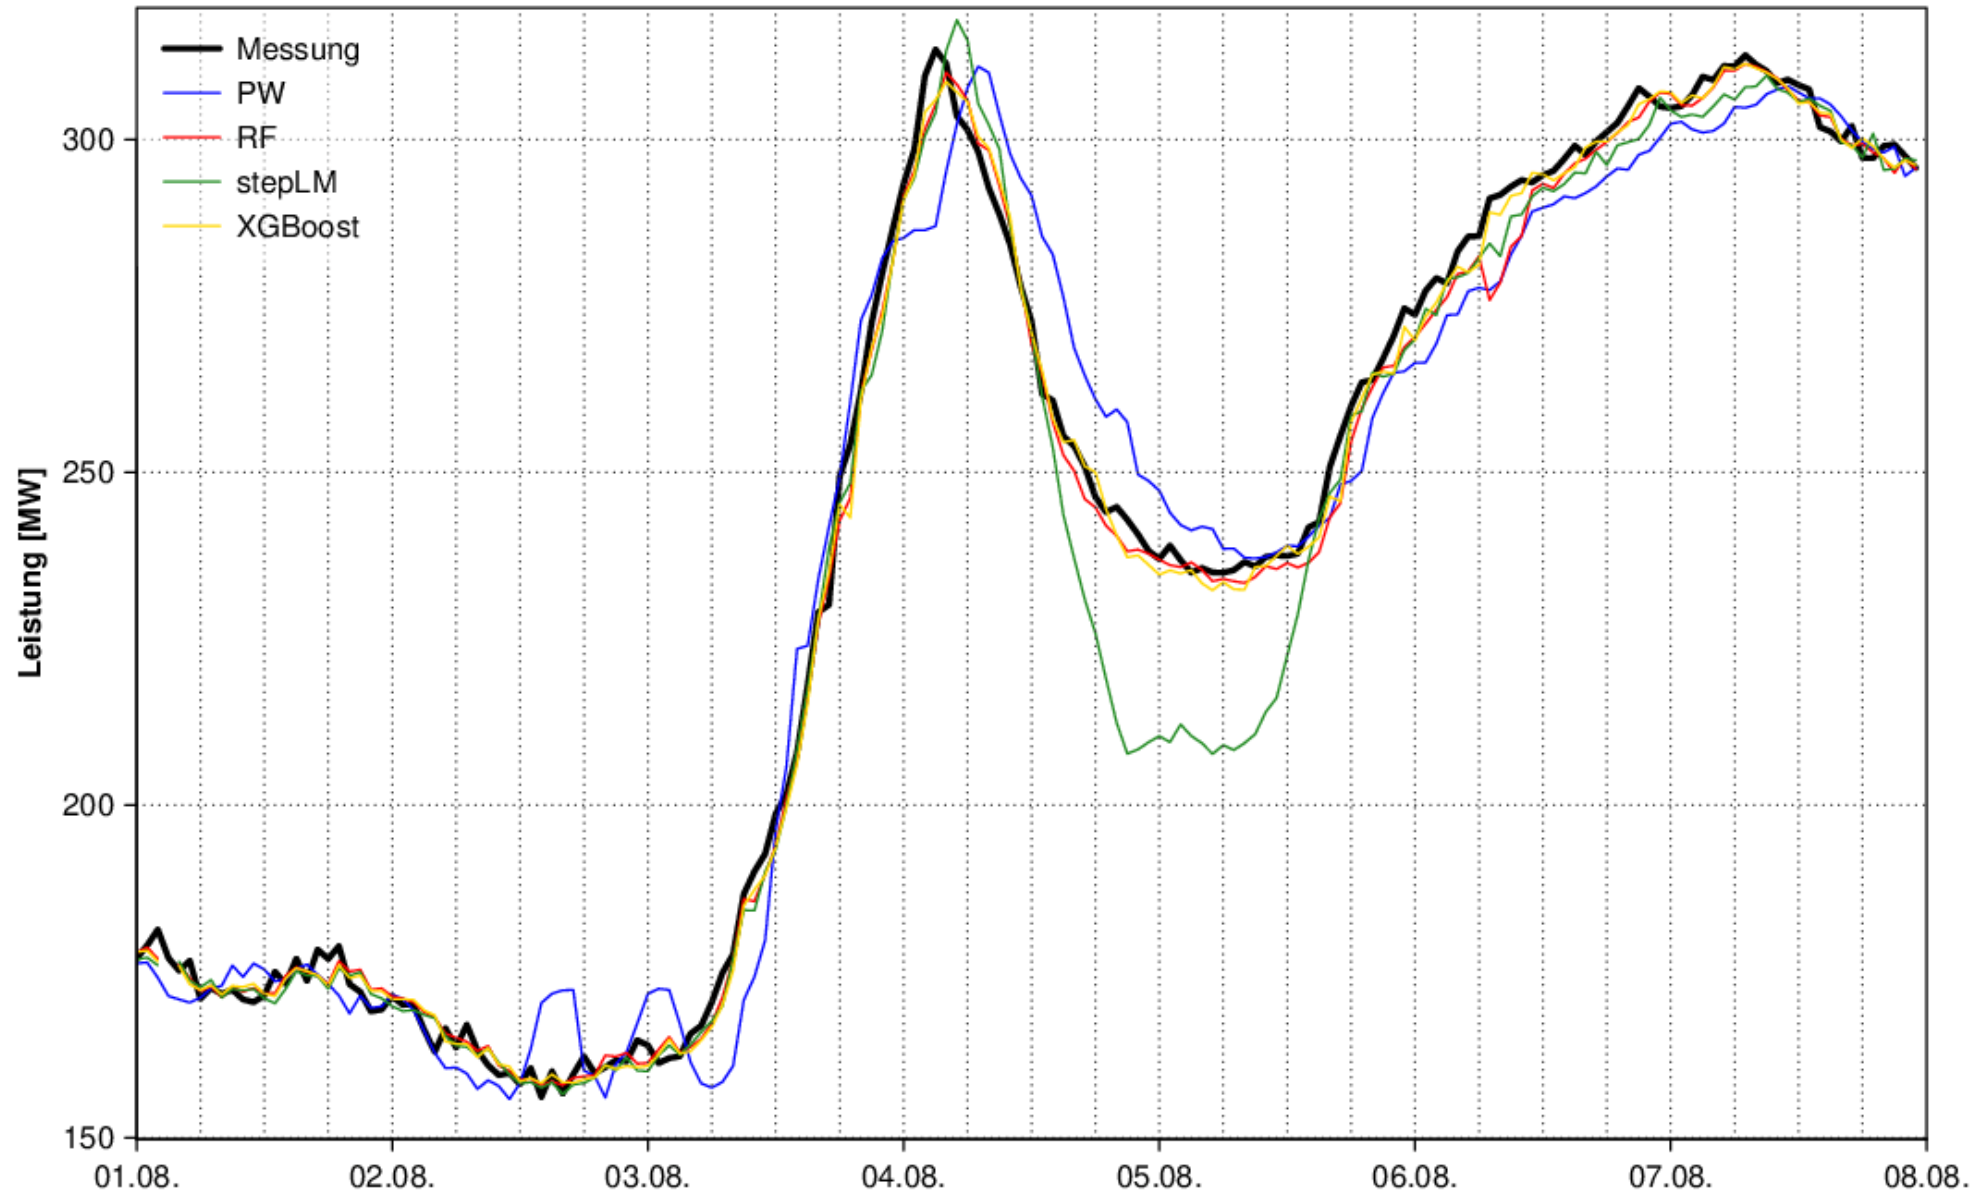

PW: RMSE = 8.77 MW | MAE = 6.75 MW  
RF: RMSE = 3.51 MW | MAE = 2.61 MW

stepLM: RMSE = 10.03 MW | MAE = 6.05 MW  
XGBoost: RMSE = 2.94 MW | MAE = 2.34 MW



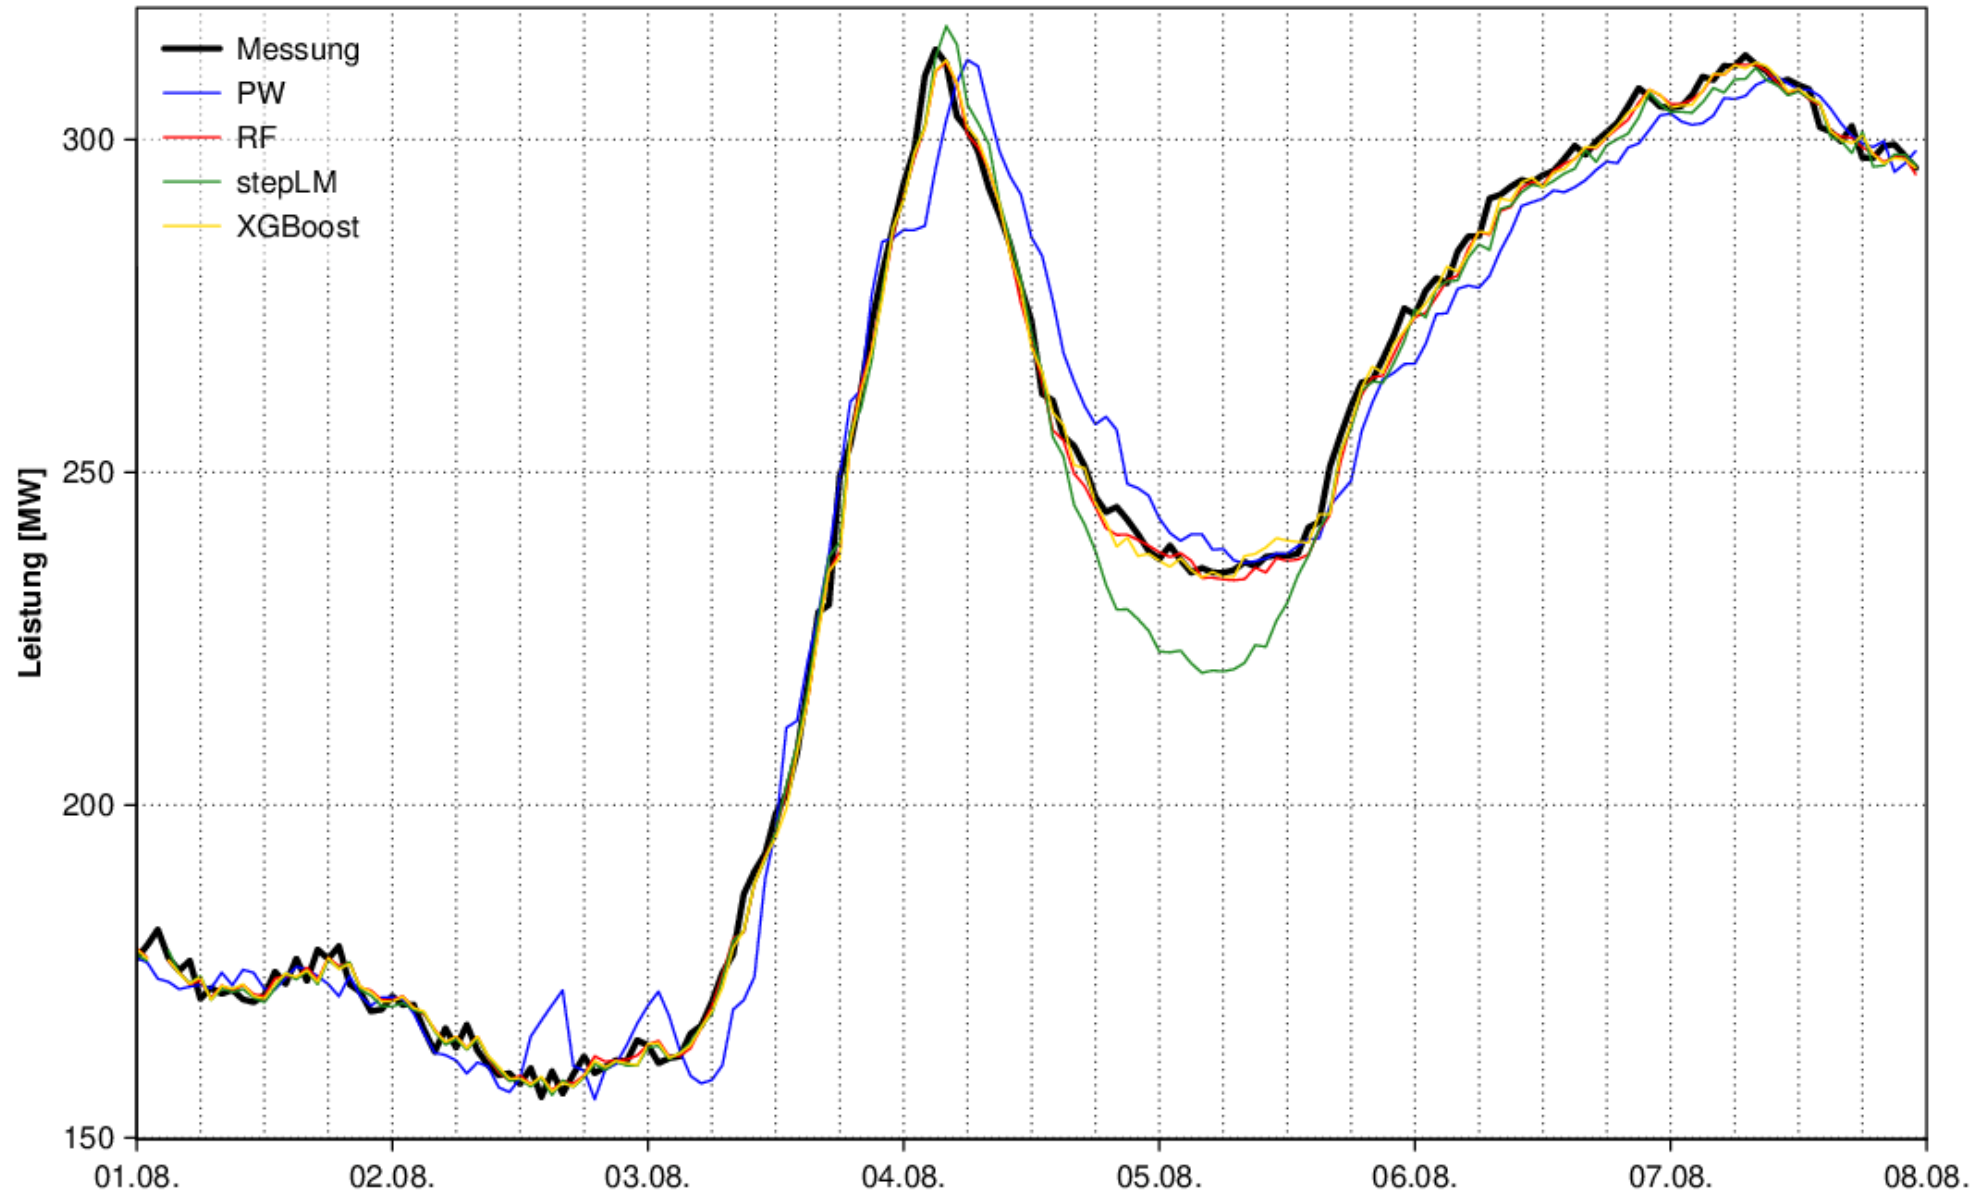

PW: RMSE = 6.81 MW | MAE = 5.17 MW  
RF: RMSE = 2.41 MW | MAE = 1.83 MW

stepLM: RMSE = 5.36 MW | MAE = 3.6 MW  
XGBoost: RMSE = 2.45 MW | MAE = 1.83 MW

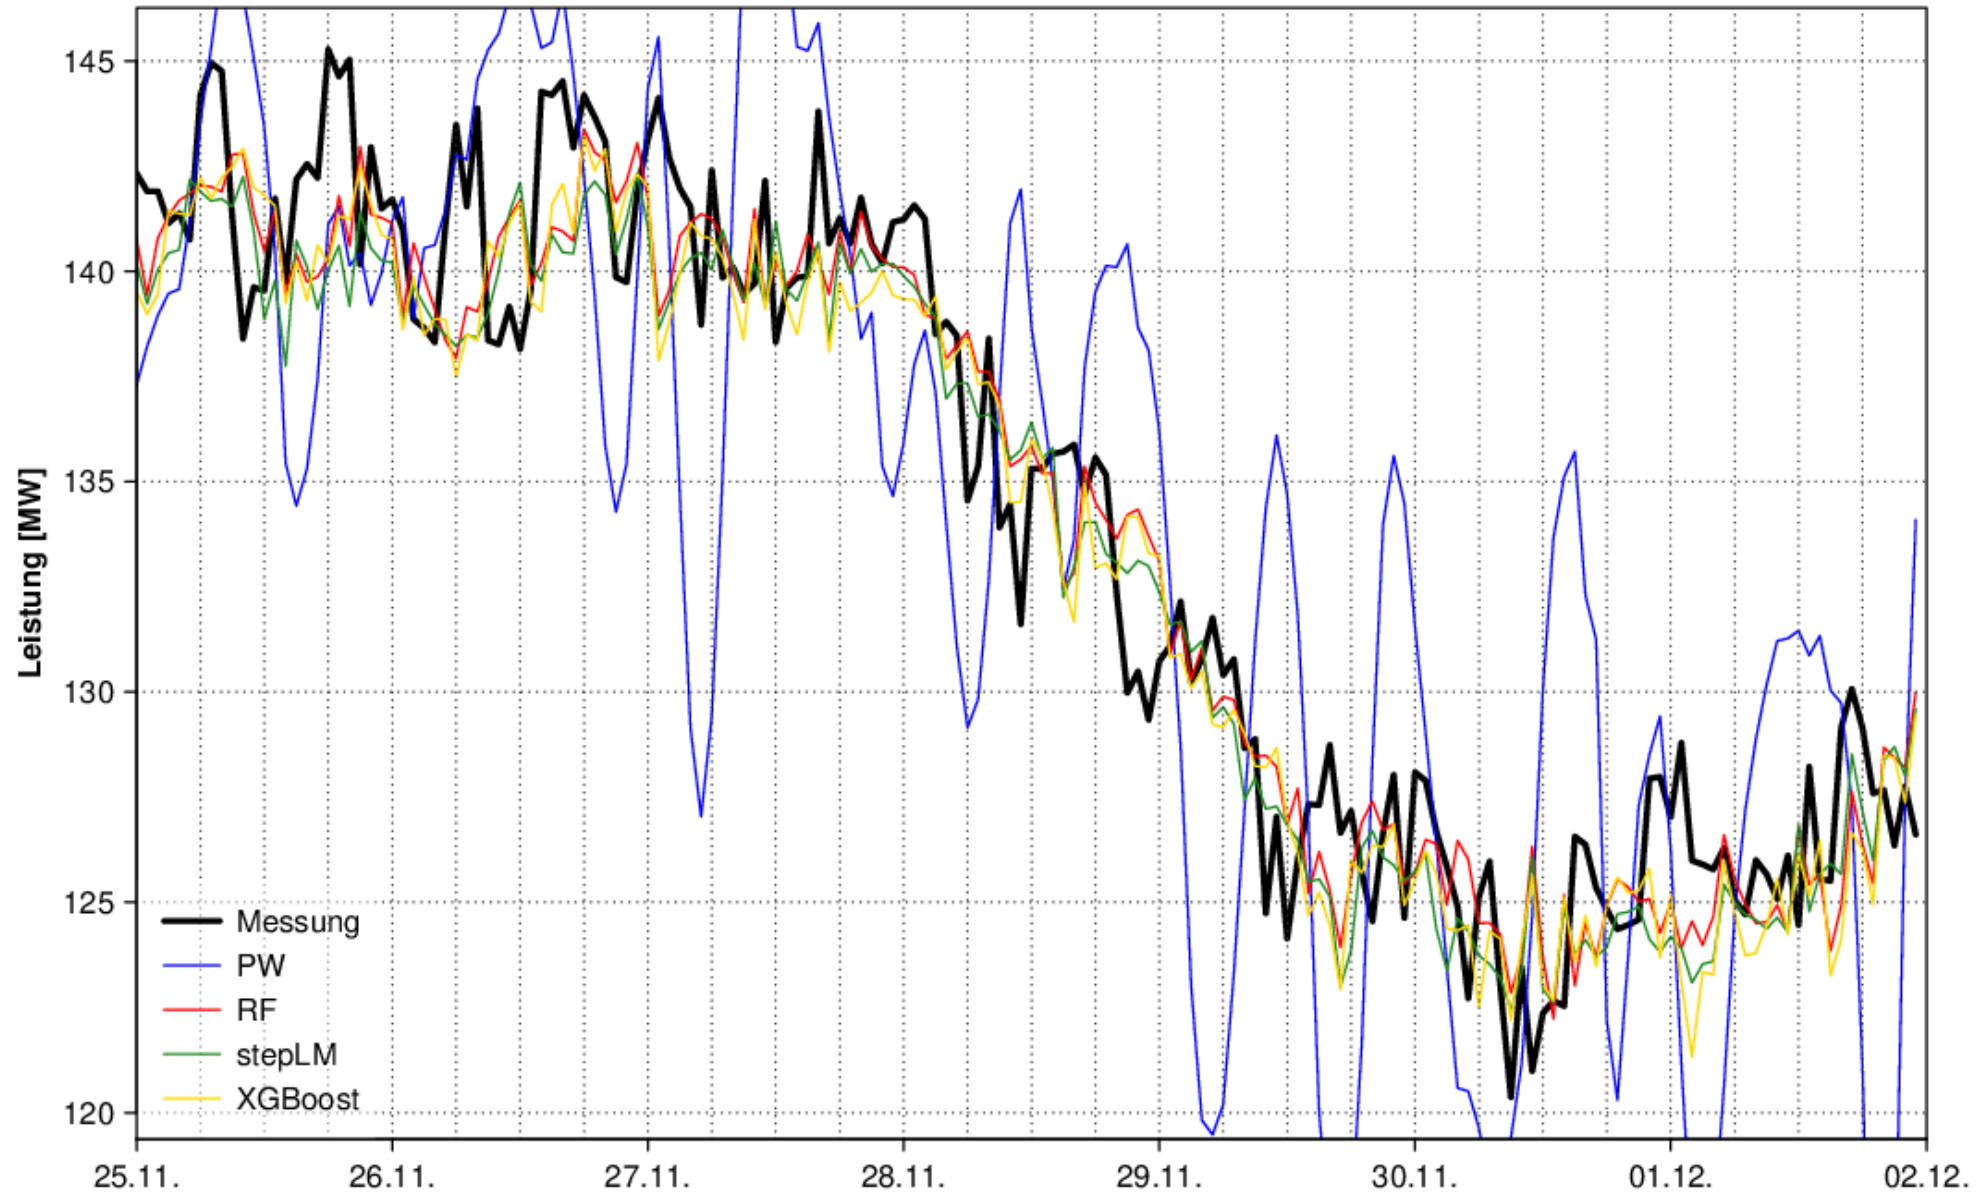

**PW: RMSE = 6.22 MW | MAE = 5.04 MW**  
**RF: RMSE = 2.2 MW | MAE = 1.76 MW**

**stepLM: RMSE = 2.27 MW | MAE = 1.84 MW**  
**XGBoost: RMSE = 2.36 MW | MAE = 1.92 MW**

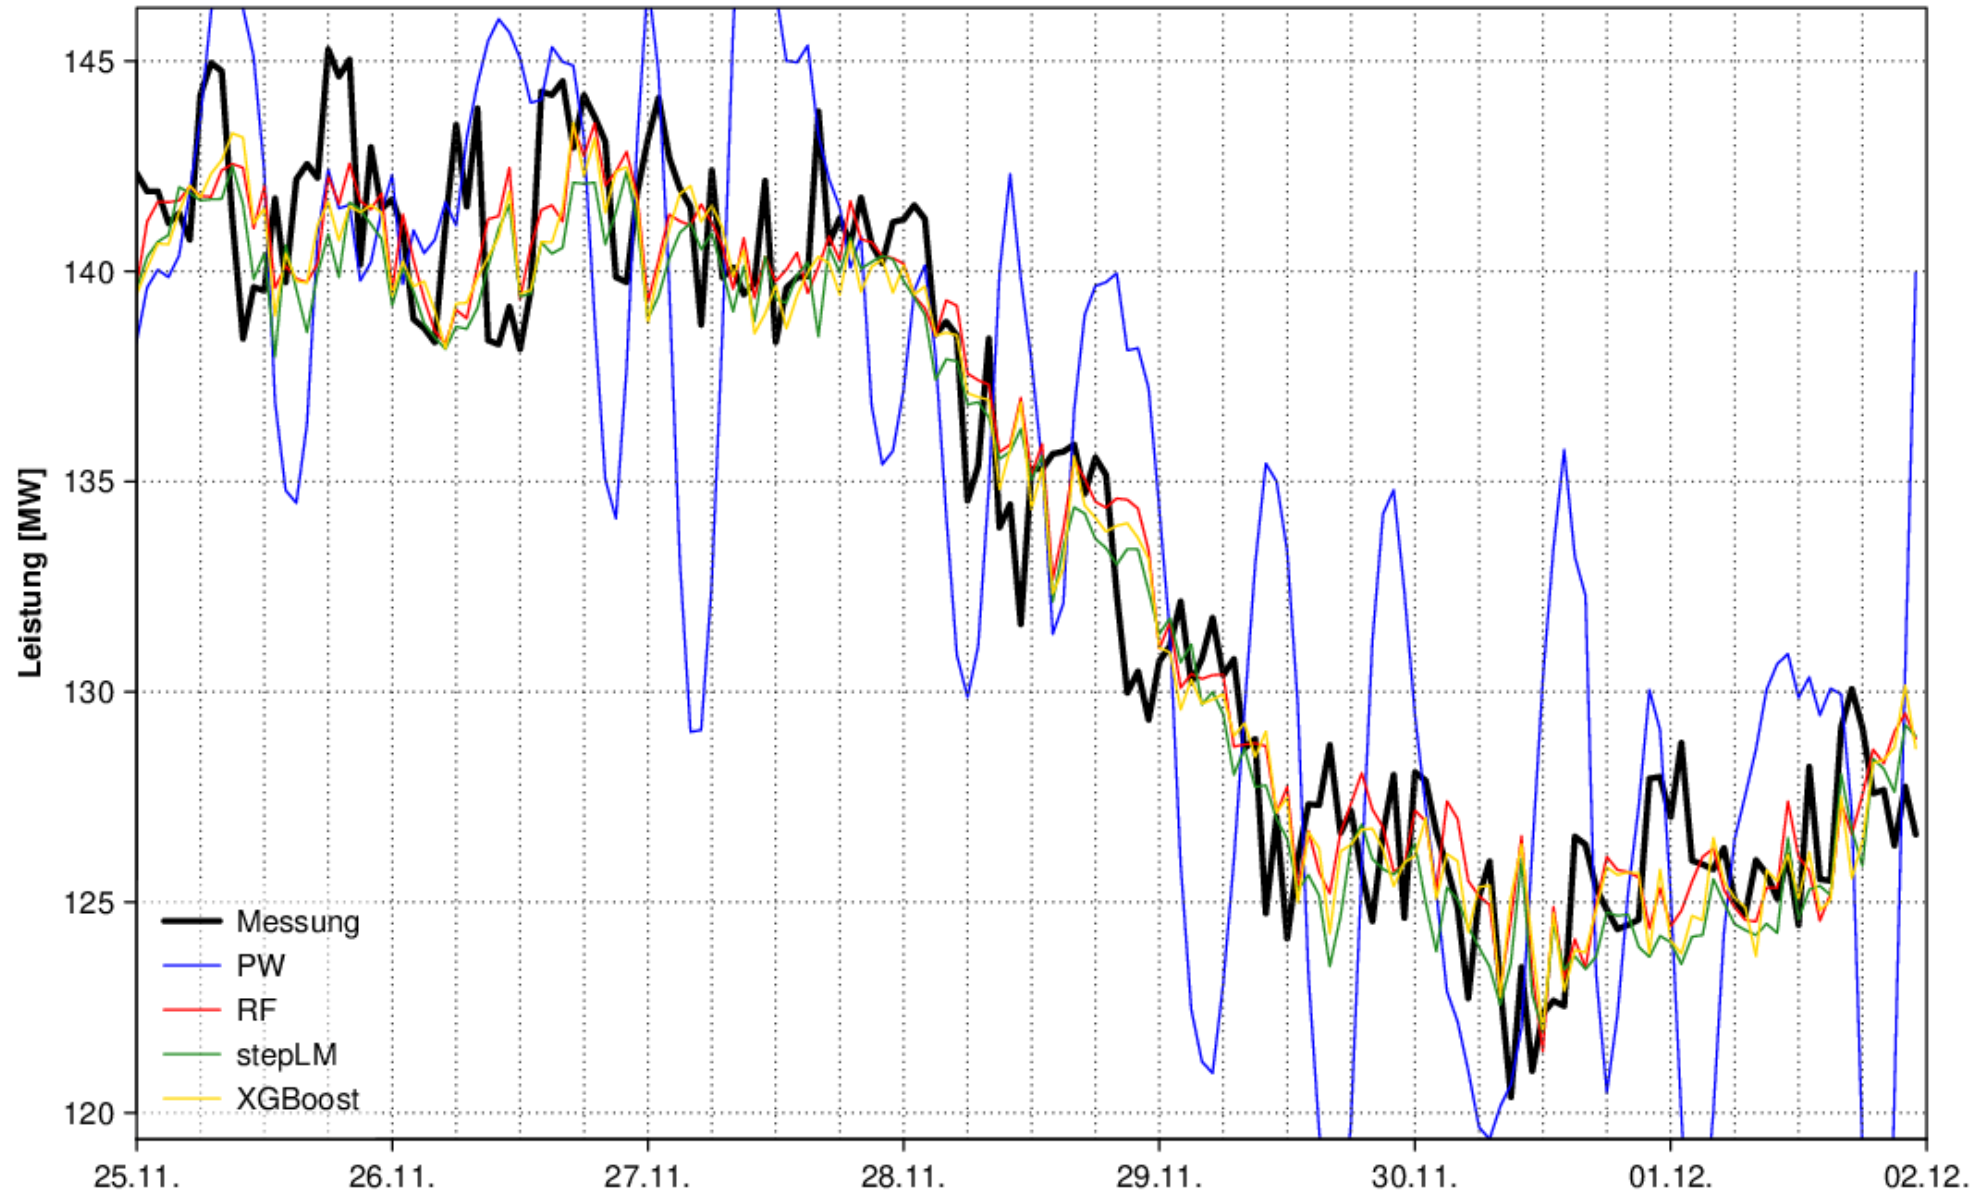

**PW: RMSE = 5.81 MW | MAE = 4.64 MW**  
**RF: RMSE = 2.02 MW | MAE = 1.61 MW**

**stepLM: RMSE = 2.17 MW | MAE = 1.75 MW**  
**XGBoost: RMSE = 2.11 MW | MAE = 1.67 MW**

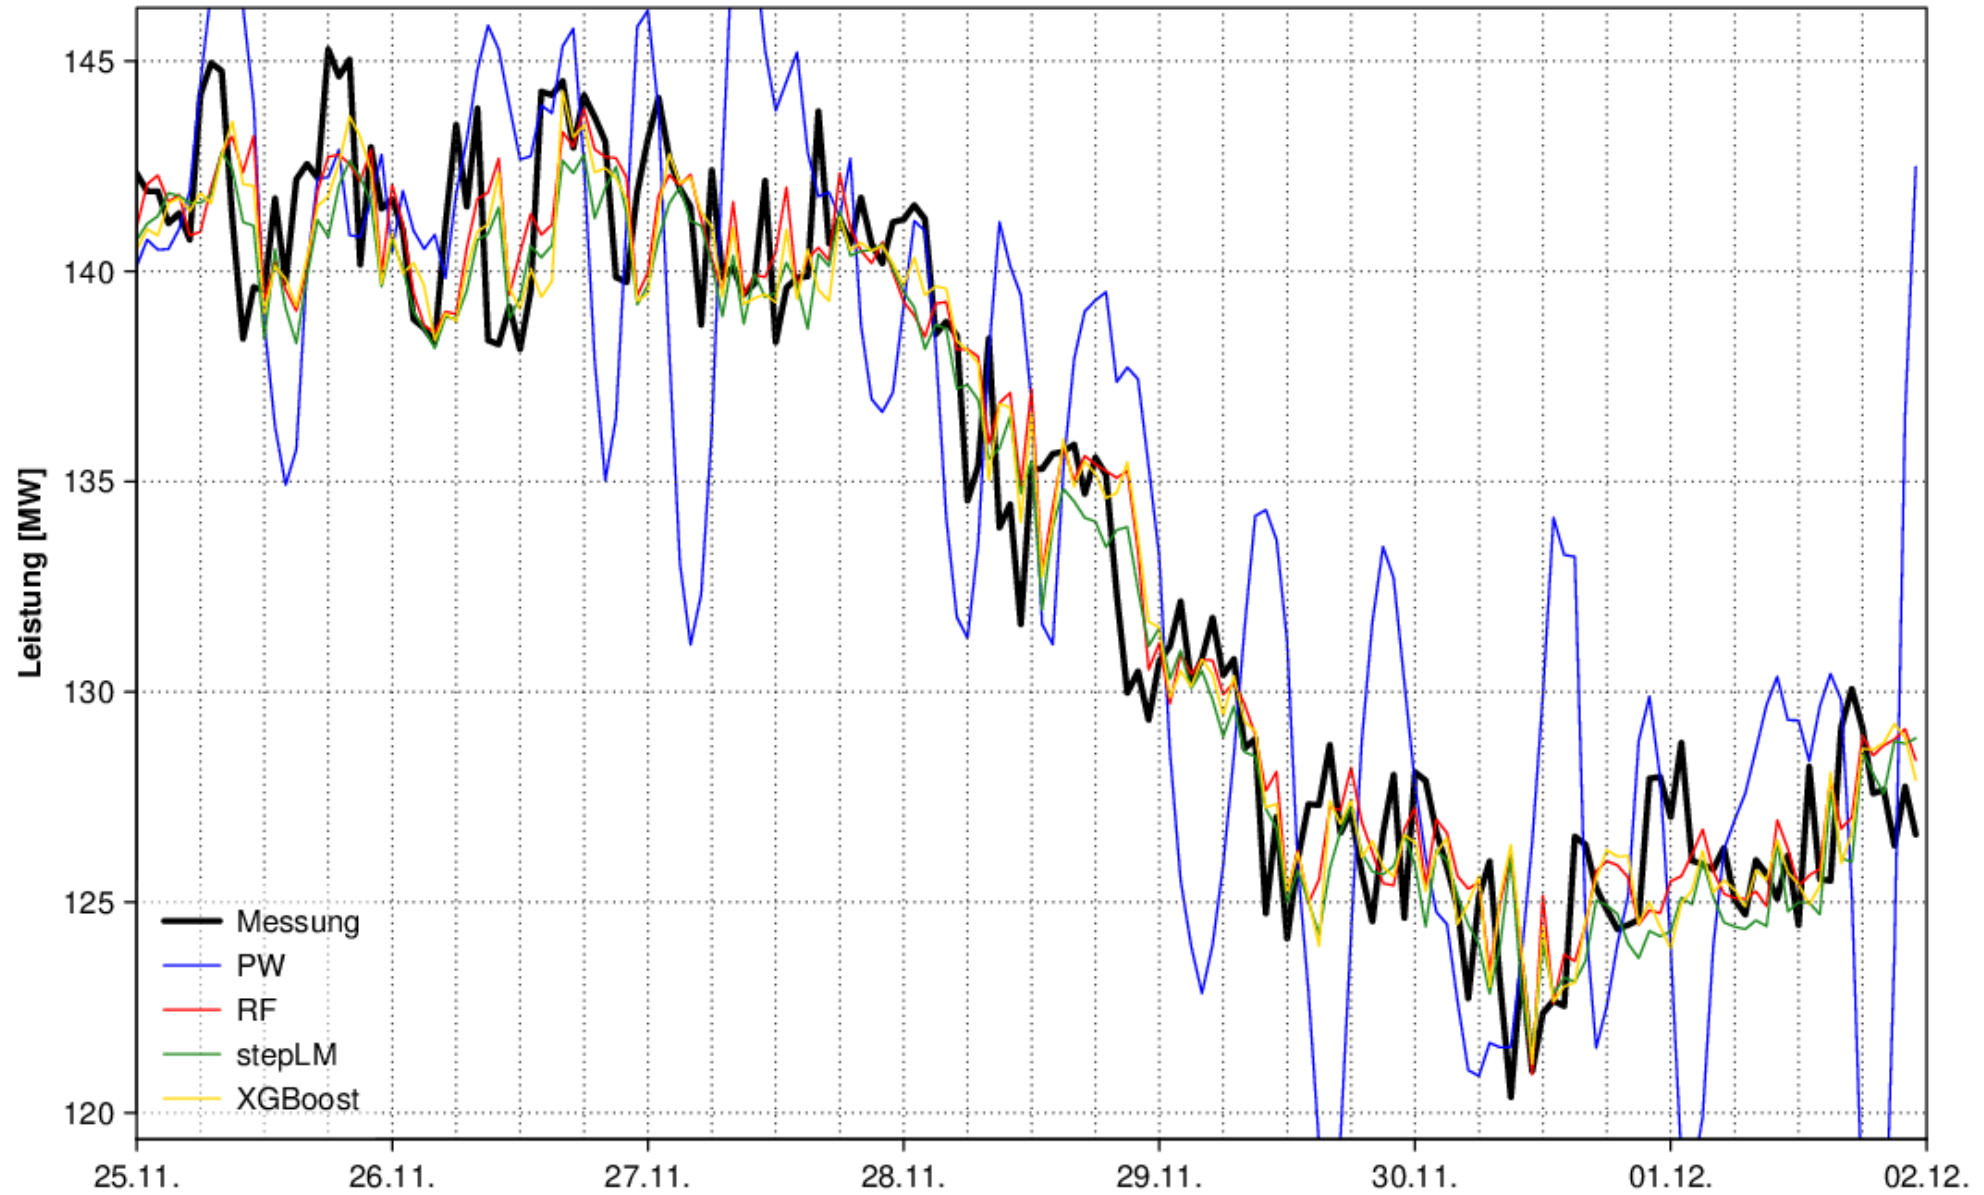

**PW: RMSE = 5.1 MW | MAE = 4.03 MW**  
**RF: RMSE = 1.92 MW | MAE = 1.5 MW**

**stepLM: RMSE = 1.96 MW | MAE = 1.56 MW**  
**XGBoost: RMSE = 1.99 MW | MAE = 1.54 MW**



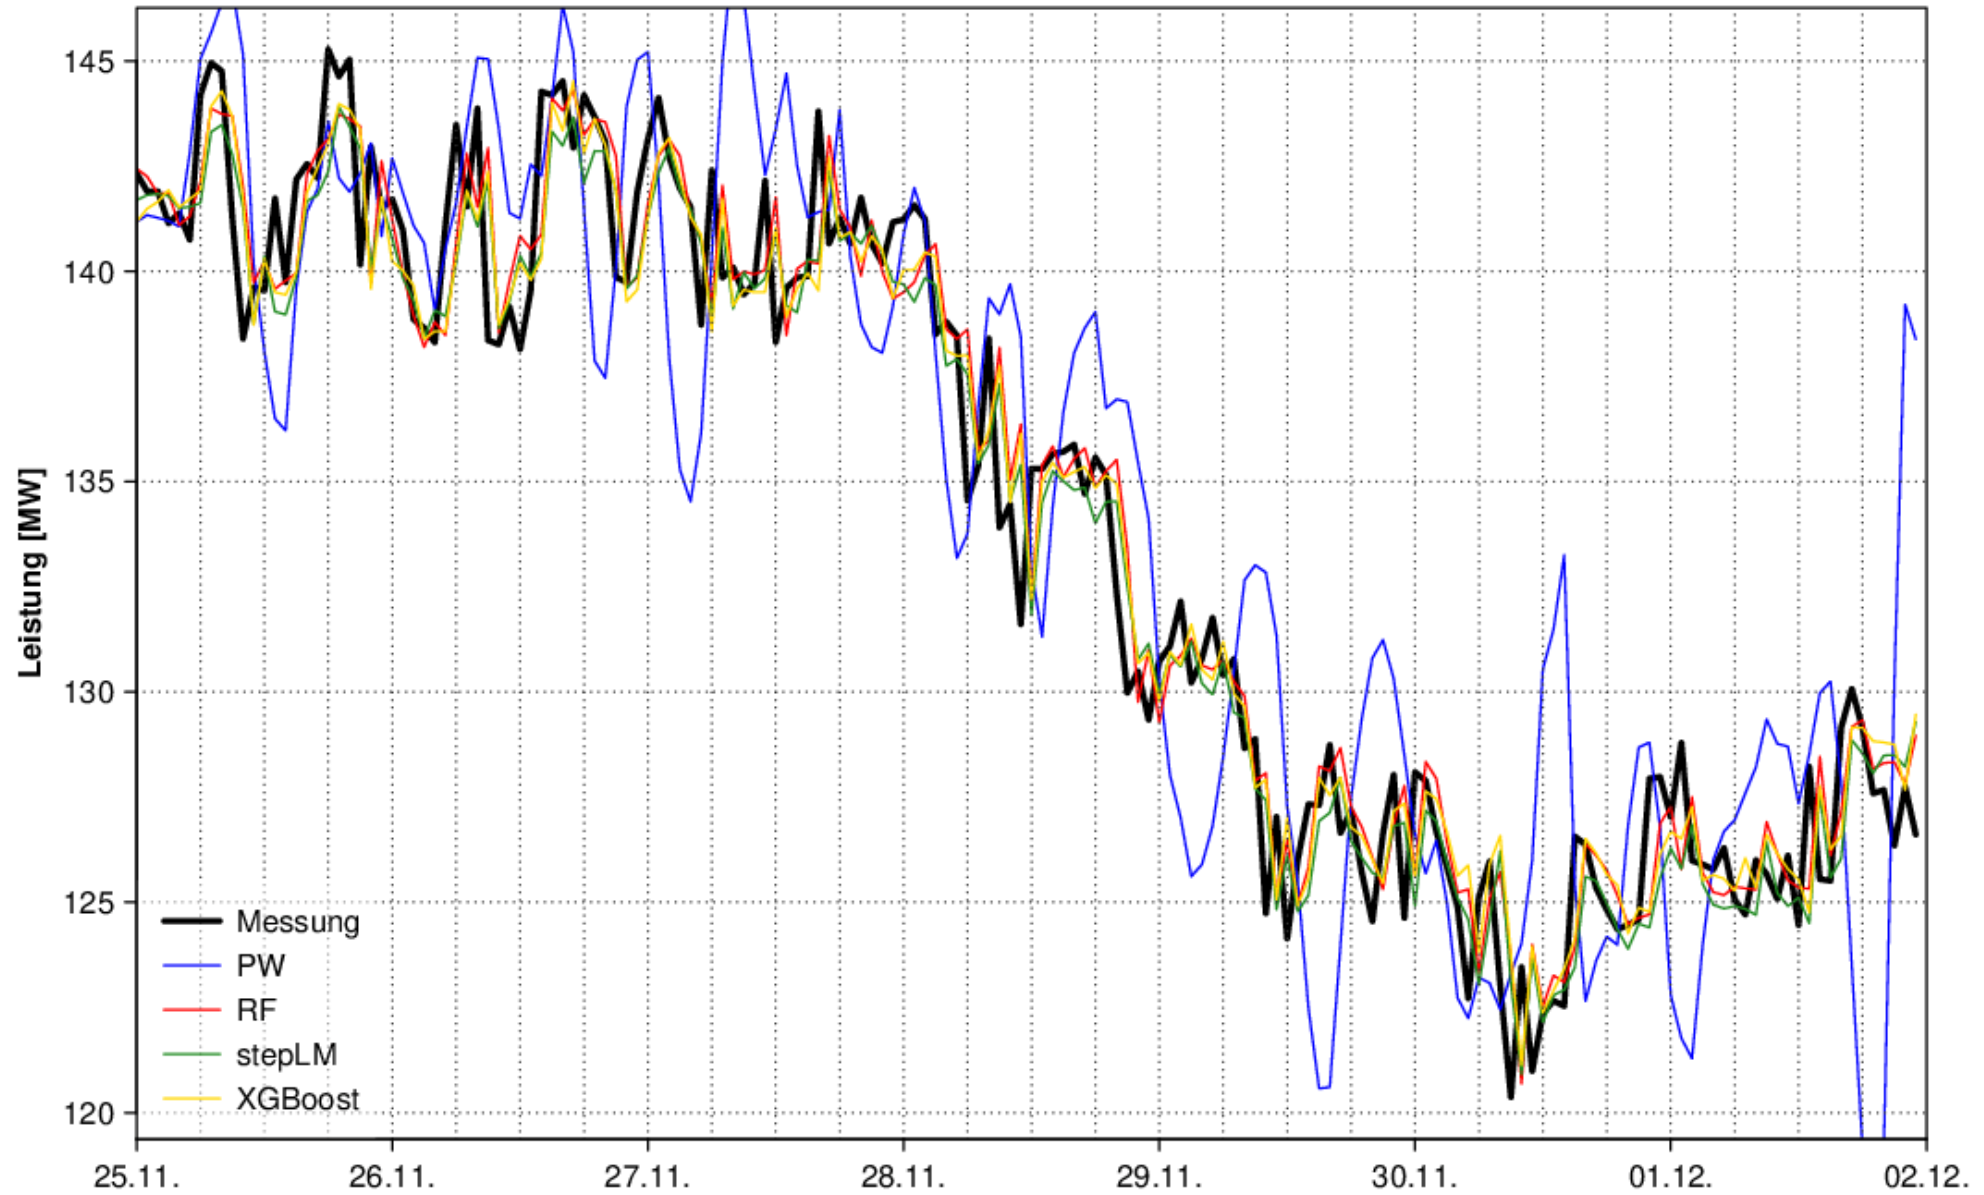

**PW: RMSE = 4.03 MW | MAE = 3.14 MW**  
**RF: RMSE = 1.74 MW | MAE = 1.33 MW**

**stepLM: RMSE = 1.68 MW | MAE = 1.32 MW**  
**XGBoost: RMSE = 1.72 MW | MAE = 1.32 MW**

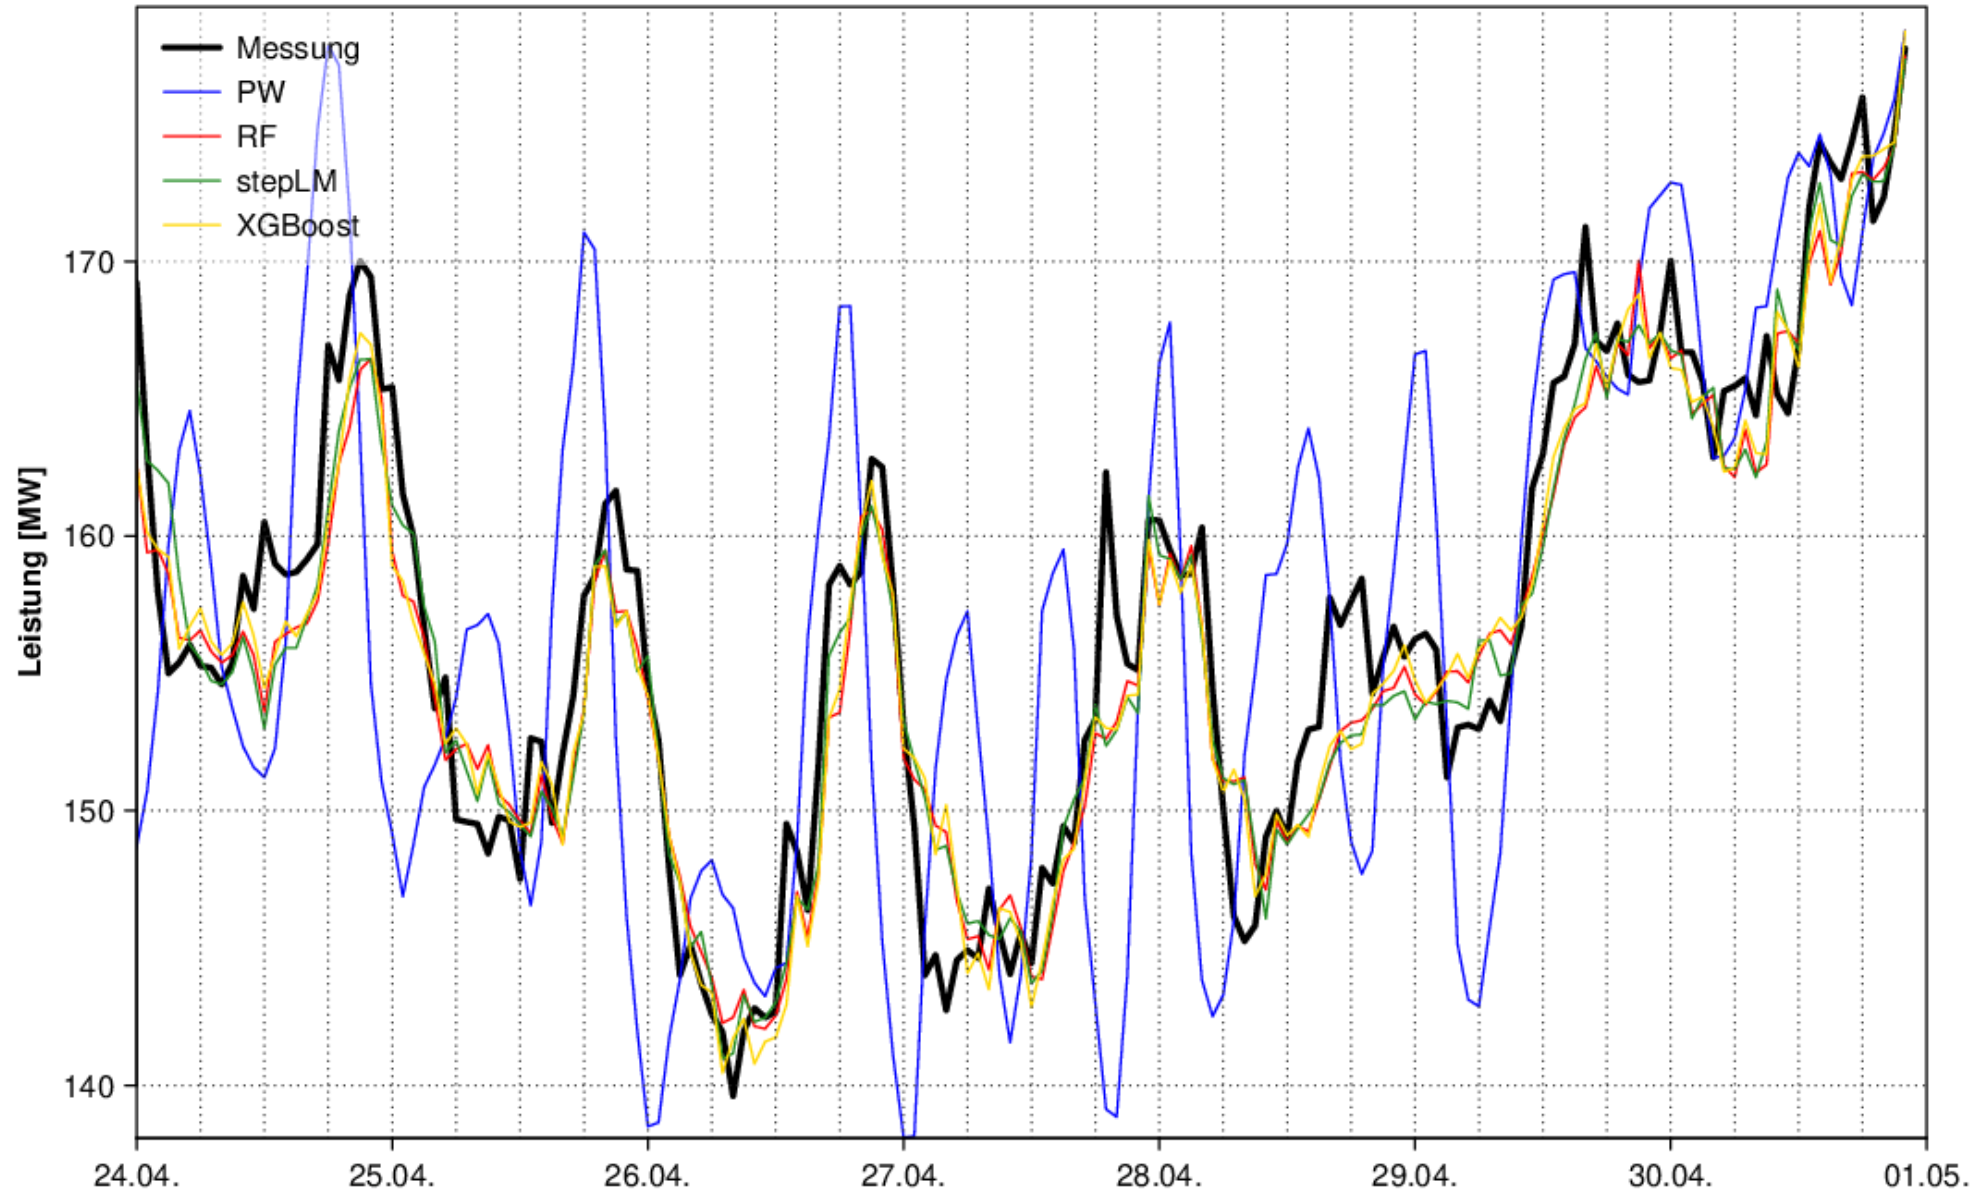

PW: RMSE = 8.2 MW | MAE = 6.64 MW  
RF: RMSE = 2.92 MW | MAE = 2.31 MW

stepLM: RMSE = 2.76 MW | MAE = 2.16 MW  
XGBoost: RMSE = 2.85 MW | MAE = 2.24 MW



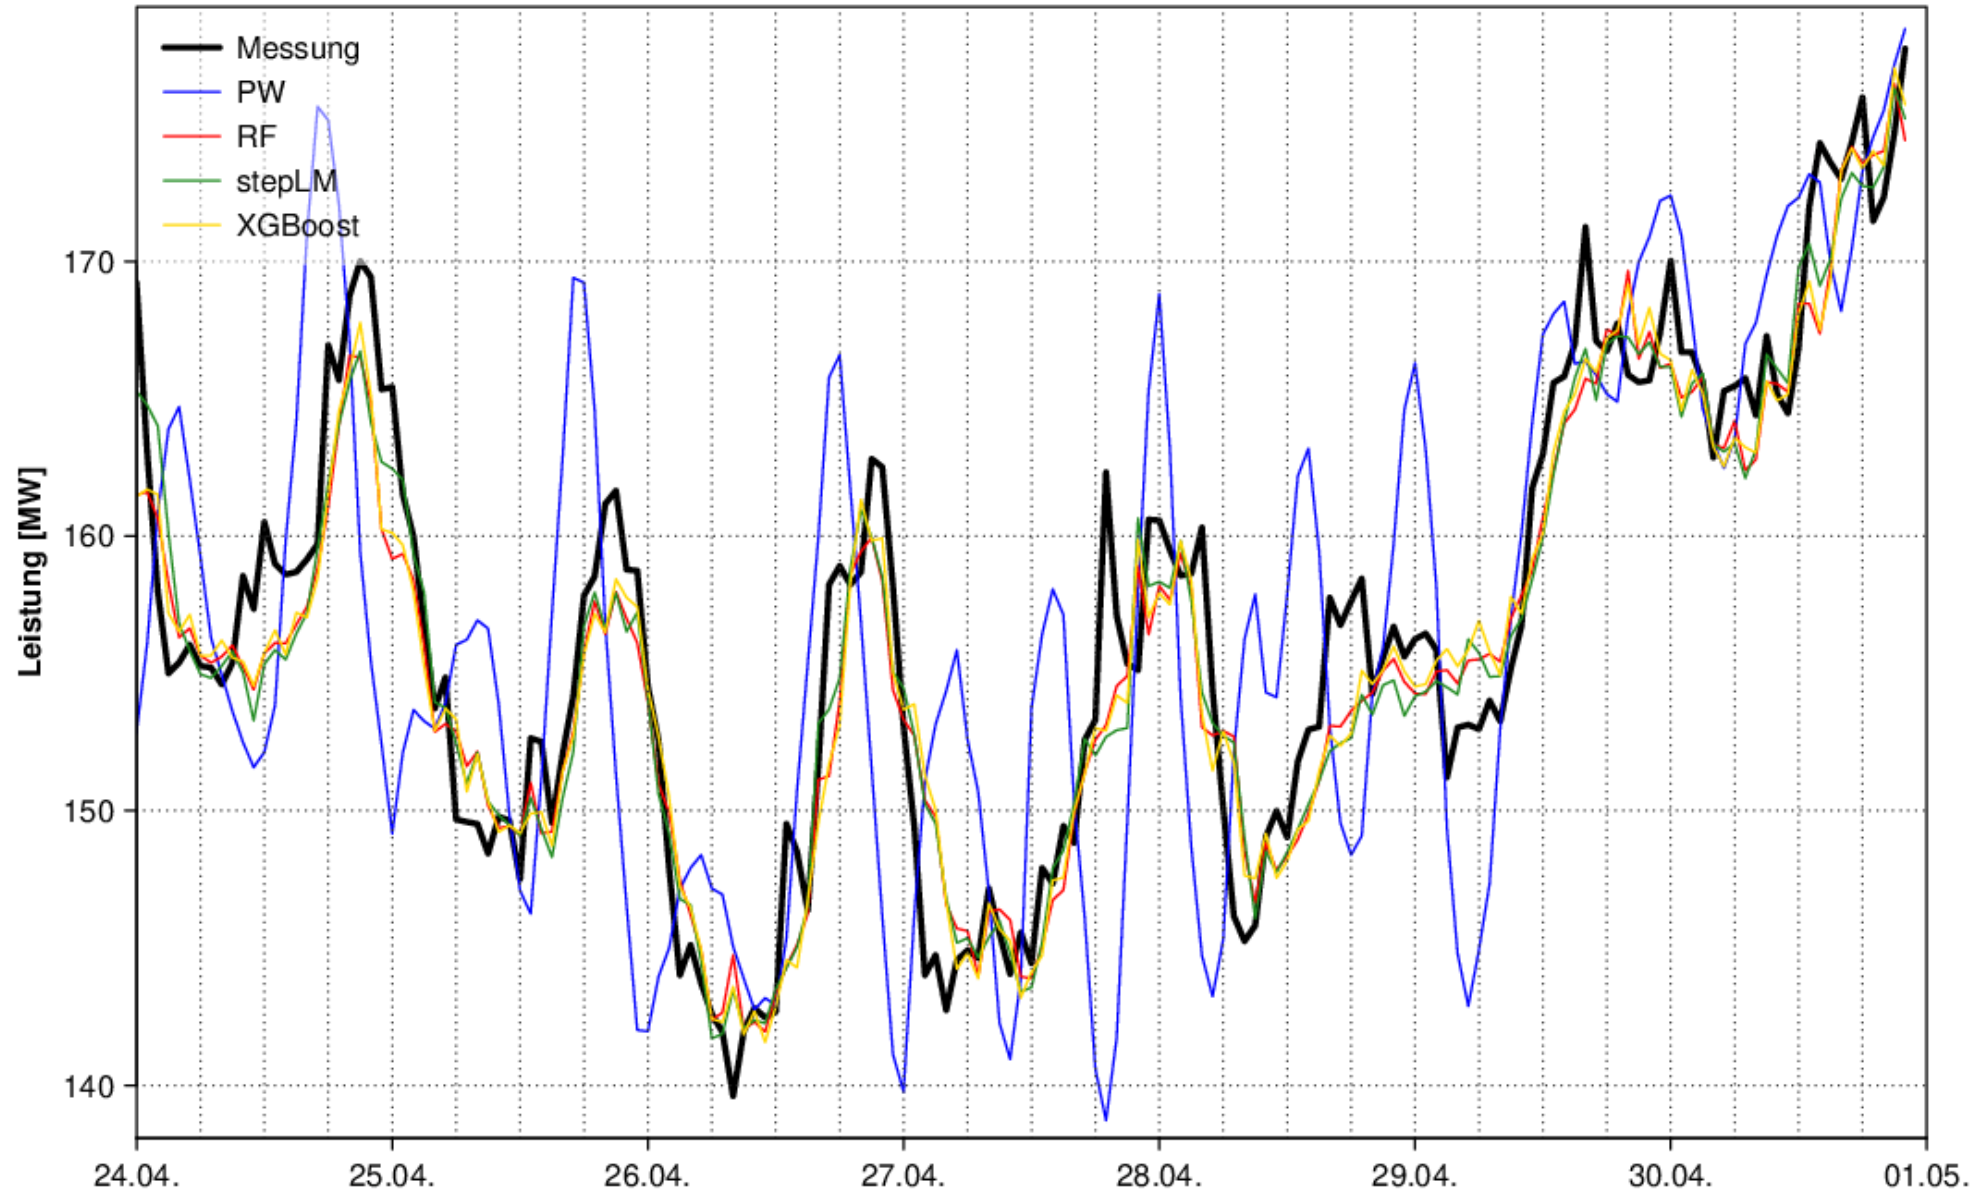

PW: RMSE = 7.51 MW | MAE = 6.06 MW  
RF: RMSE = 2.84 MW | MAE = 2.23 MW

stepLM: RMSE = 2.72 MW | MAE = 2.16 MW  
XGBoost: RMSE = 2.82 MW | MAE = 2.2 MW

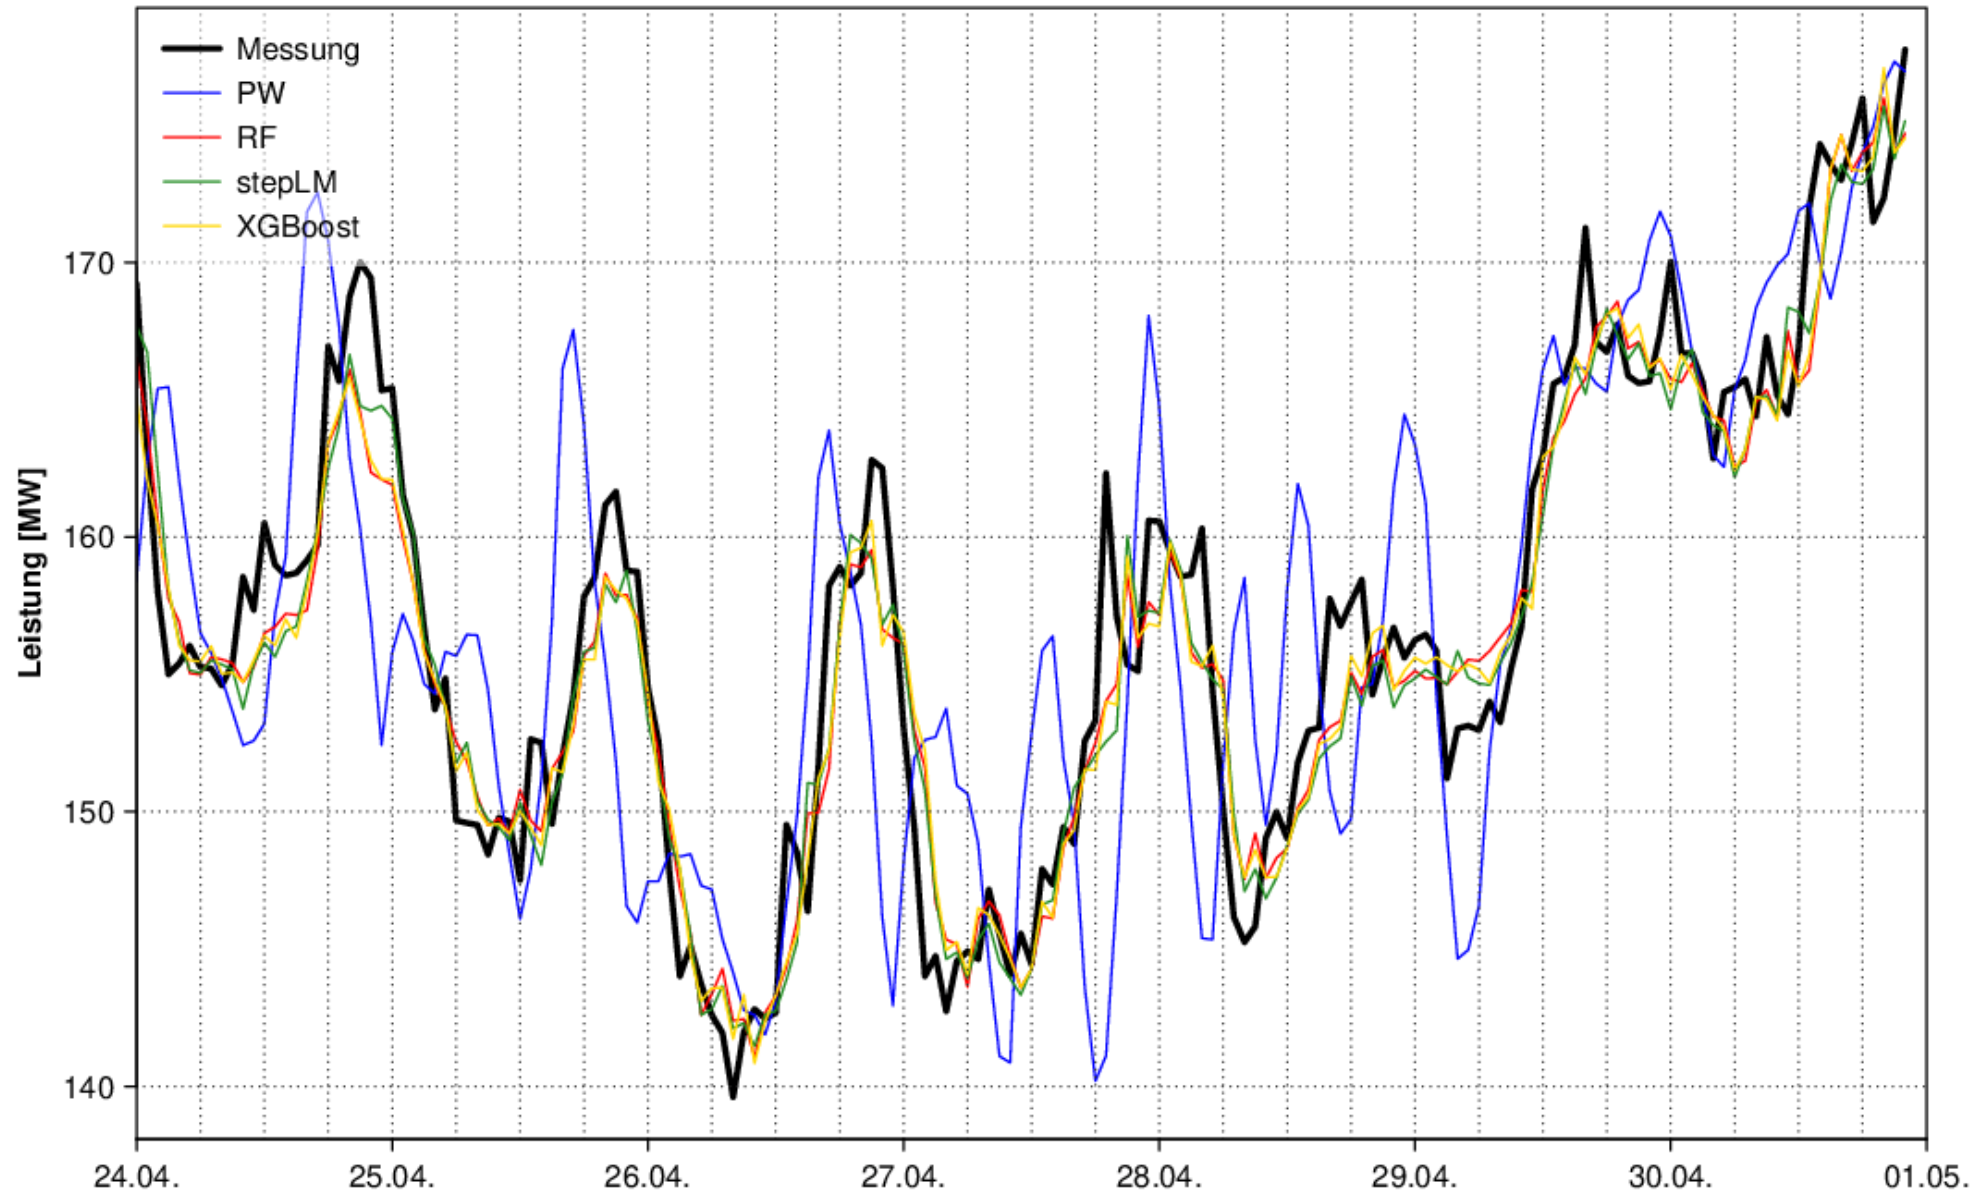

PW: RMSE = 6.48 MW | MAE = 5.03 MW  
RF: RMSE = 2.58 MW | MAE = 2.05 MW

stepLM: RMSE = 2.64 MW | MAE = 2.04 MW  
XGBoost: RMSE = 2.62 MW | MAE = 2.06 MW

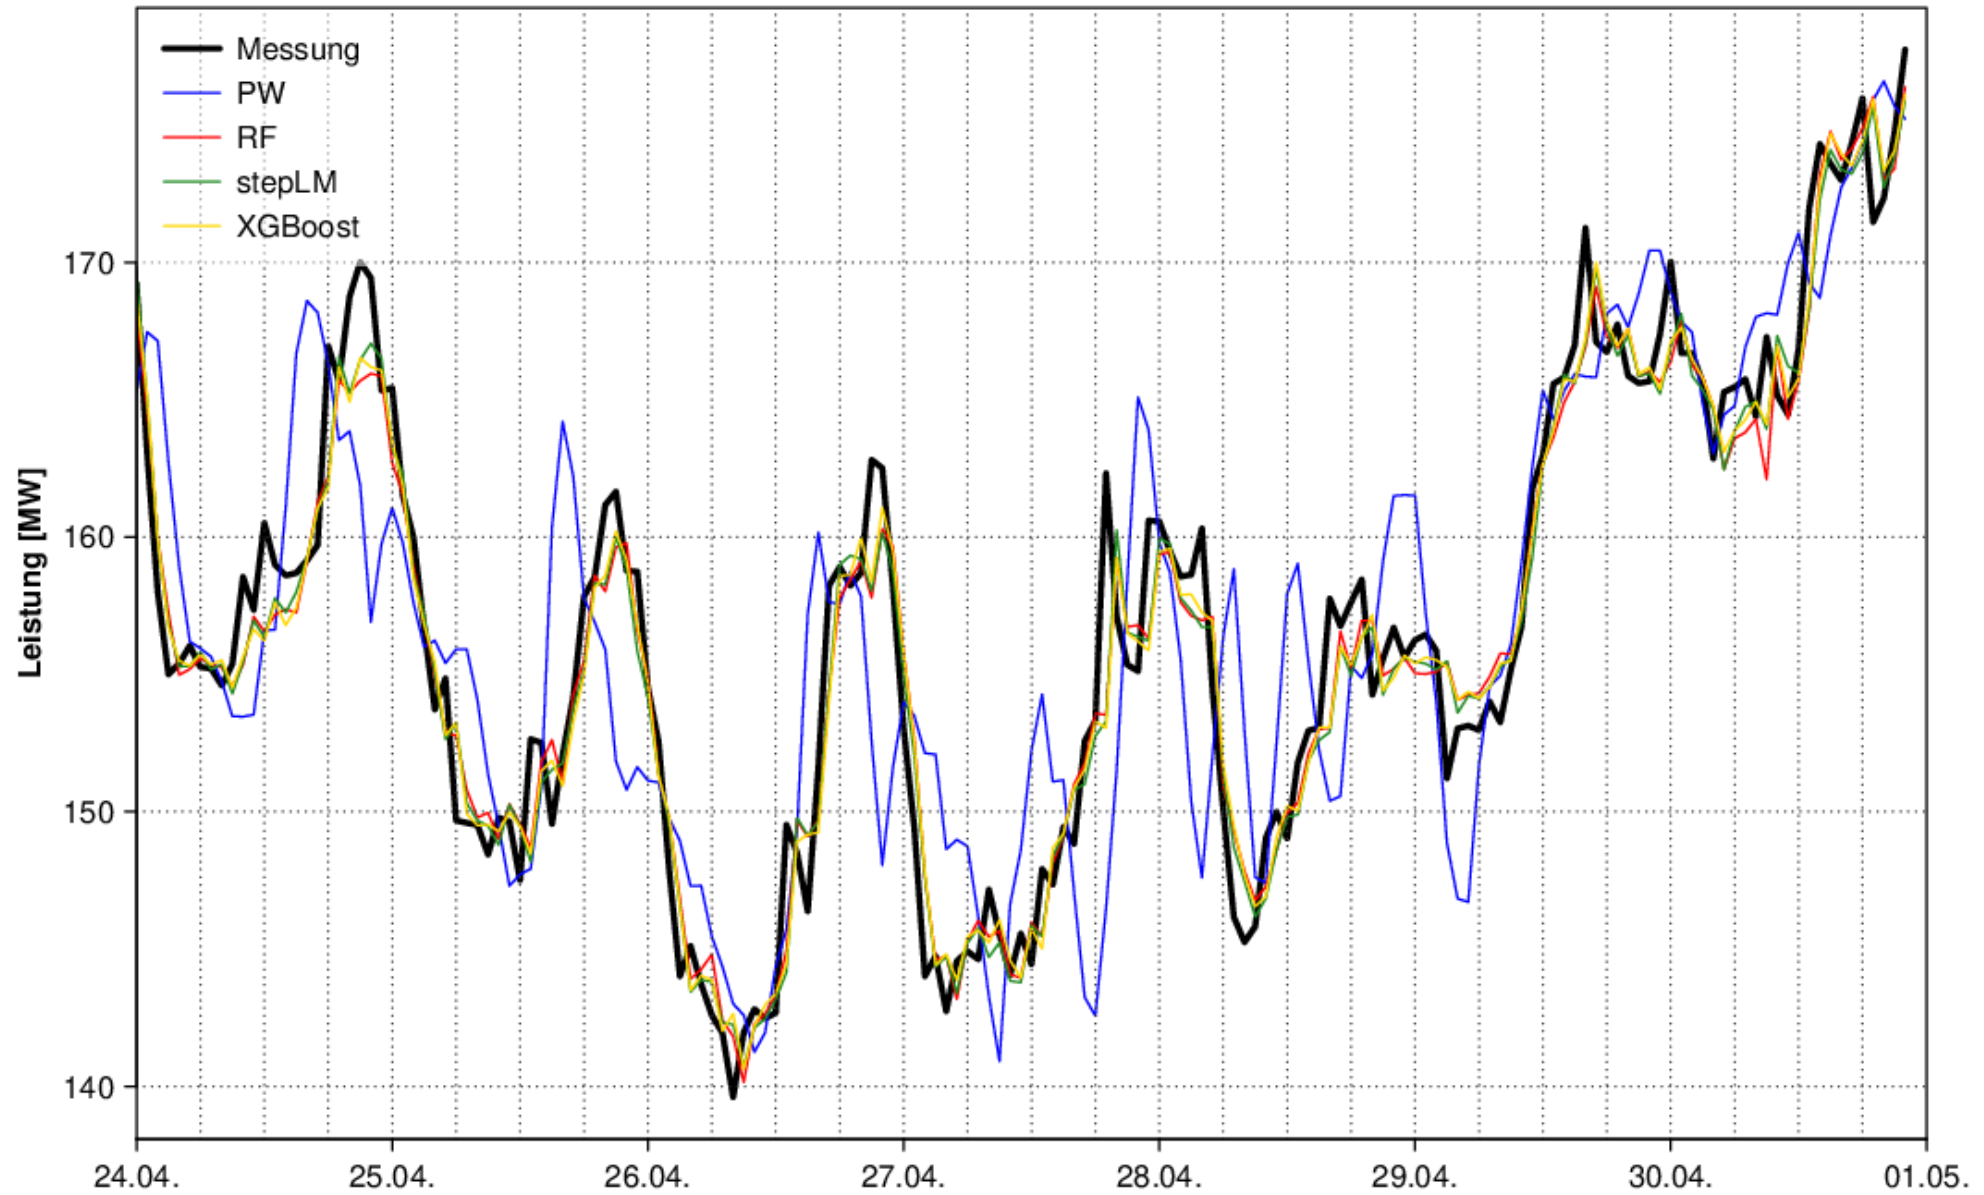

PW: RMSE = 5.12 MW | MAE = 3.92 MW  
RF: RMSE = 2.11 MW | MAE = 1.62 MW

stepLM: RMSE = 2.09 MW | MAE = 1.61 MW  
XGBoost: RMSE = 2.08 MW | MAE = 1.6 MW

## 2) Feature Importance

- der ML-Modelle „Random Forest“ (RF) sowie „XGBoost“
- für alle 4 Prognosestufen (4 bis 1h)
- auf einer relativen Skala
- Prediktoren-Kombination BGS3
- Kürzel der Variablen siehe Zusatz von Tab. 4 im Artikel

RF | 4h

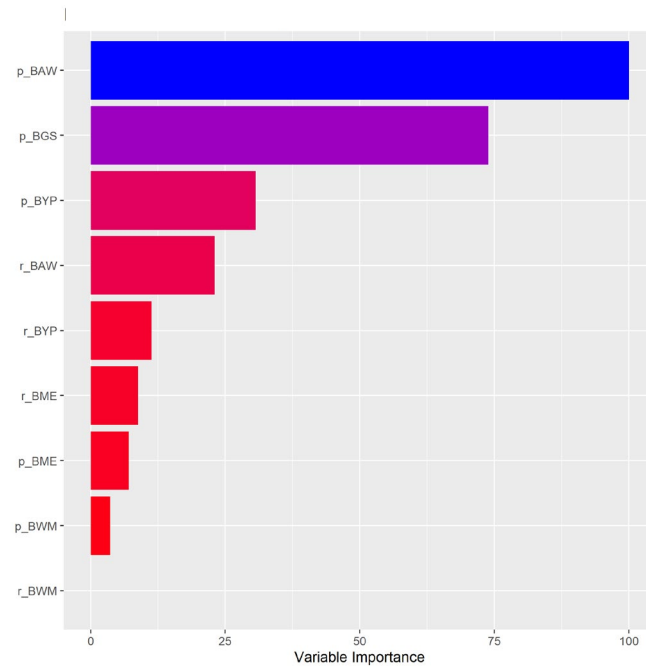

RF | 2h

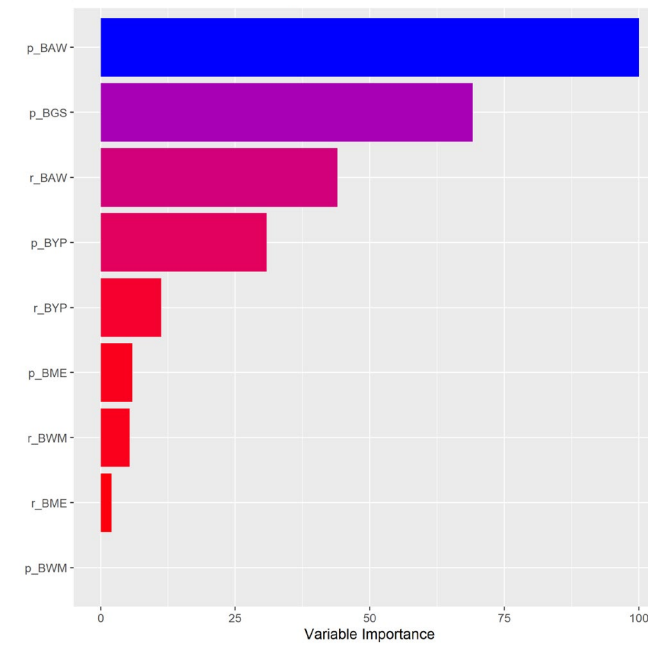

RF | 3h

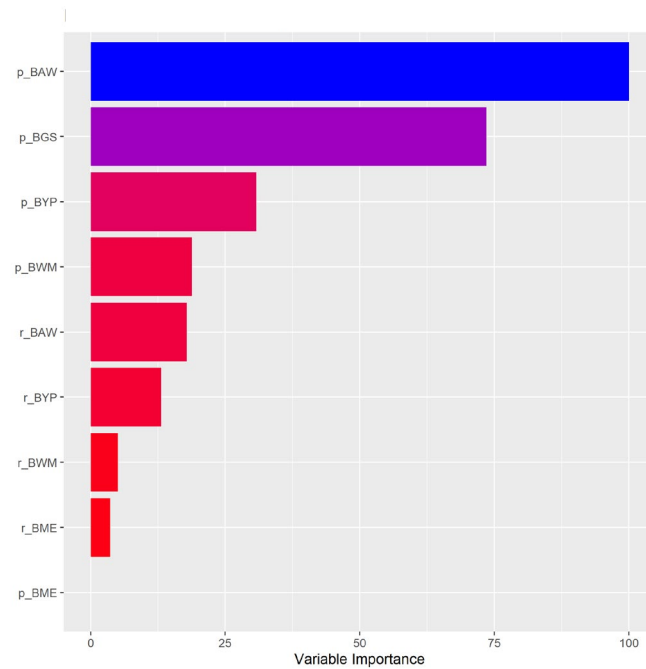

RF | 1h

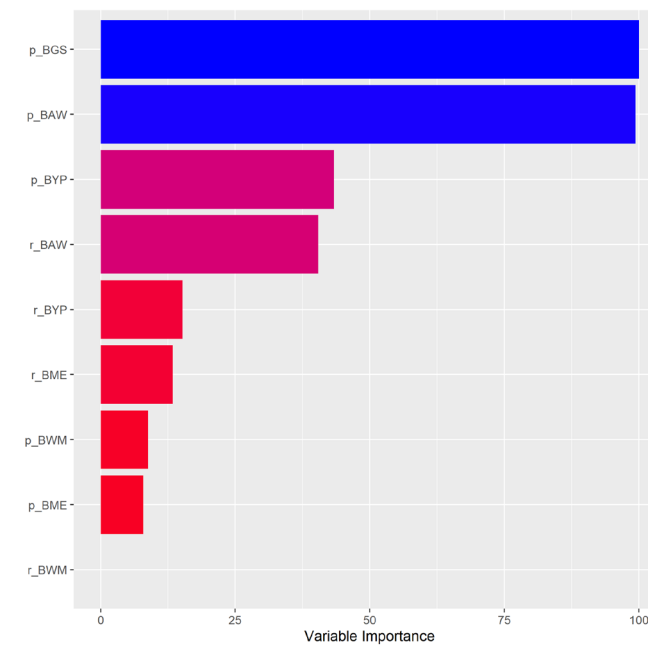

XGB | 4h

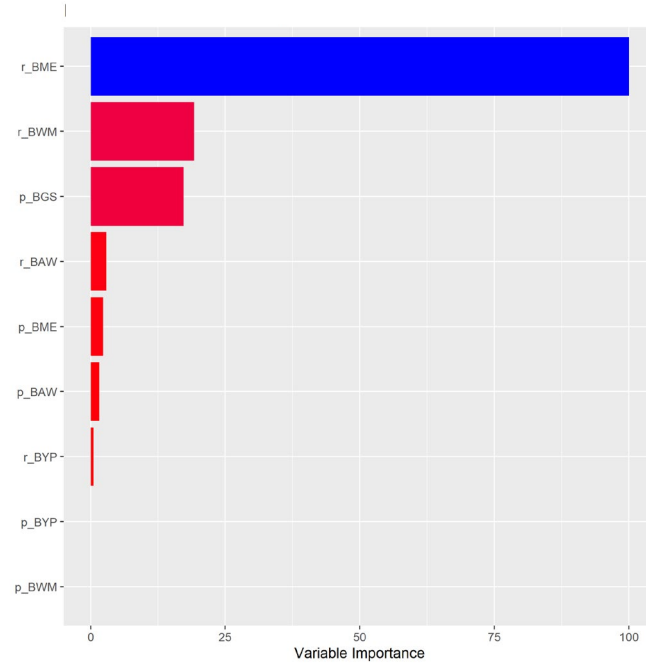

XGB | 2h

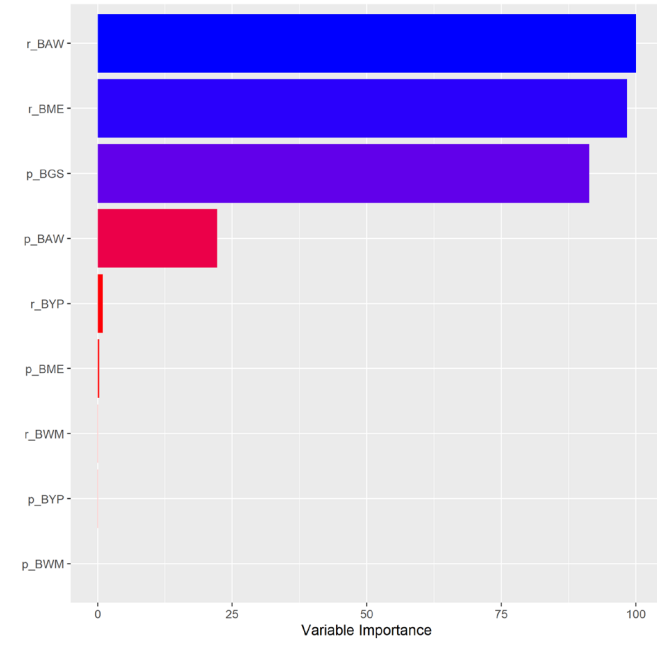

XGB | 3h

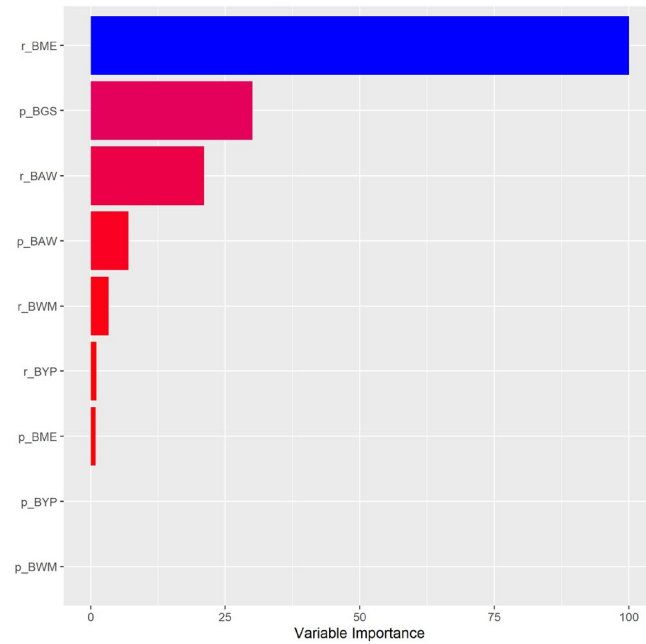

XGB | 1h

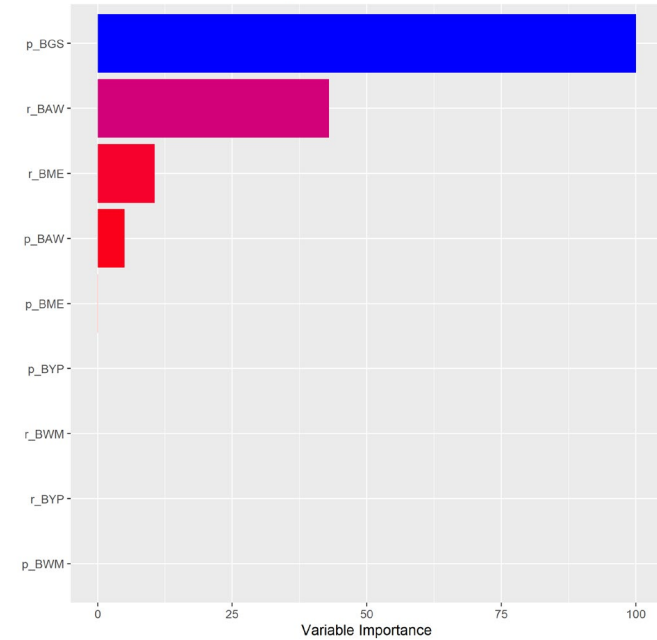

Supplement: MOESM3 [file 20147994]
